# Cardiac Cell Type-Specific Gene Regulatory Programs and Disease Risk Association

## AUTHORS

James D. Hocker<sup>1-3</sup>, Olivier B. Poirion<sup>4#</sup>, Fugui Zhu<sup>5#</sup>, Justin Buchanan<sup>4</sup>, Kai Zhang<sup>3</sup>, Joshua Chiou<sup>2,6</sup>, Tsui-Min Wang<sup>7</sup>, Xiaomeng Hou<sup>4</sup>, Yang E. Li<sup>3</sup>, Yanxiao Zhang<sup>3</sup>, Elie N. Farah<sup>2,5</sup>, Allen Wang<sup>4</sup>, Andrew D. McCulloch<sup>7,8</sup>, Kyle J. Gaulton<sup>6,9</sup>, Bing Ren<sup>3,4,9,10\*</sup>, Neil C. Chi<sup>5,10\*</sup>, Sebastian Preissl<sup>4\*</sup>

## AFFILIATIONS

1. Medical Scientist Training Program, University of California San Diego, La Jolla, CA
2. Biomedical Sciences Graduate Program, University of California San Diego, La Jolla, CA
3. Ludwig Institute for Cancer Research, La Jolla, CA
4. Center for Epigenomics, University of California San Diego, La Jolla, CA
5. Department of Medicine, Division of Cardiology, University of California San Diego, La Jolla, CA
6. Department of Pediatrics, Pediatric Diabetes Research Center, University of California San Diego, La Jolla, CA
7. Departments of Bioengineering and Medicine, University of California San Diego, La Jolla, CA, USA.
8. Institute for Engineering in Medicine, University of California San Diego, La Jolla, CA
9. Department of Cellular and Molecular Medicine, University of California San Diego School of Medicine, La Jolla, CA
10. Institute for Genomic Medicine, University of California San Diego, La Jolla, CA

# contributed equally

\* corresponding authors

Correspondence:

Neil Chi, MD, PhD ([nchi@health.ucsd.edu](mailto:nchi@health.ucsd.edu))

Bing Ren, PhD ([biren@health.ucsd.edu](mailto:biren@health.ucsd.edu))

Sebastian Preissl, PhD ([spreissl@health.ucsd.edu](mailto:spreissl@health.ucsd.edu))

1 **ABSTRACT**

2

3 **Background:** *Cis*-regulatory elements such as enhancers and promoters are crucial for  
4 directing gene expression in the human heart. Dysregulation of these elements can result  
5 in many cardiovascular diseases that are major leading causes of morbidity and mortality  
6 worldwide. In addition, genetic variants associated with cardiovascular disease risk are  
7 enriched within *cis*-regulatory elements. However, the location and activity of these *cis*-  
8 regulatory elements in individual cardiac cell types remains to be fully defined.

9

10 **Methods:** We performed single nucleus ATAC-seq and single nucleus RNA-seq to define  
11 a comprehensive catalogue of candidate *cis*-regulatory elements (cCREs) and gene  
12 expression patterns for the distinct cell types comprising each chamber of four non-failing  
13 human hearts. We used this catalogue to computationally deconvolute dynamic  
14 enhancers in failing hearts and to assign cardiovascular disease risk variants to cCREs  
15 in individual cardiac cell types. Finally, we applied reporter assays, genome editing and  
16 electrophysiological measurements in *in vitro* differentiated human cardiomyocytes to  
17 validate the molecular mechanisms of cardiovascular disease risk variants.

18

19 **Results:** We defined >287,000 candidate *cis*-regulatory elements (cCREs) in human  
20 hearts at single-cell resolution, which notably revealed gene regulatory programs  
21 controlling specific cell types in a cardiac region/structure-dependent manner and during  
22 heart failure. We further report enrichment of cardiovascular disease risk variants in  
23 cCREs of distinct cardiac cell types, including a strong enrichment of atrial fibrillation  
24 variants in cardiomyocyte cCREs, and reveal 38 candidate causal atrial fibrillation  
25 variants localized to cardiomyocyte cCREs. Two such risk variants residing within a  
26 cardiomyocyte-specific cCRE at the *KCNH2/HERG* locus resulted in reduced enhancer  
27 activity compared to the non-risk allele. Finally, we found that deletion of the cCRE  
28 containing these variants decreased *KCNH2* expression and prolonged action potential  
29 repolarization in an enhancer dosage-dependent manner.

30

31 **Conclusions:** This comprehensive atlas of human cardiac cCREs provides the  
32 foundation for not only illuminating cell type-specific gene regulatory programs controlling  
33 human hearts during health and disease, but also interpreting genetic risk loci for a wide  
34 spectrum of cardiovascular diseases.

## 35 INTRODUCTION

36

37 Disruption of gene regulation is an important contributor to cardiovascular disease, the  
38 leading cause of morbidity and mortality worldwide<sup>1</sup>. *Cis*-regulatory elements such as  
39 enhancers and promoters are crucial for regulating gene expression<sup>2-4</sup>. Mutations in  
40 transcription factors and chromatin regulators can result in heart disease<sup>5,6</sup>, and genetic  
41 variants associated with risk of cardiovascular disease are enriched within annotated  
42 candidate *cis*-regulatory elements (cCREs) in the human genome<sup>7</sup>. However, a major  
43 barrier to understanding the genetic and molecular basis of cardiovascular diseases is  
44 the paucity of maps and tools to interrogate gene regulatory programs in the distinct cell  
45 types of the human heart. Recent single cell/nucleus RNA-seq<sup>8-10</sup> and spatial  
46 transcriptomic<sup>11</sup> studies have revealed gene expression patterns in distinct cardiac cell  
47 types across developmental and adulthood stages in the human heart, including some  
48 which display gene expression patterns that are cardiac chamber/region-specific<sup>9,10</sup>.  
49 However, the transcriptional regulatory programs responsible for cell type-specific and  
50 chamber-specific gene expression, and their potential links to non-coding risk variants for  
51 cardiovascular diseases and traits, remain to be fully defined.

52

53 Candidate *cis*-regulatory elements (cCREs) have been annotated in the human genome  
54 with the use of ChIP-seq, DNase-Seq, ATAC-seq, GRO-seq, etc. in a broad spectrum of  
55 human tissues including in bulk heart tissues and in purified cardiomyocytes<sup>2-4,12-15</sup>. These  
56 maps have provided important insights into dynamic gene regulation during heart failure<sup>14-</sup>  
57 <sup>16</sup> and begun to shed light on the function of non-coding cardiovascular disease  
58 variants<sup>7,12,15</sup>. However, major limitations of these studies including their focus on  
59 particular chambers/regions of the heart and failure to interrogate *cis*-regulatory elements  
60 across all distinct cardiac cell types, have restricted their utility in understanding how  
61 specific gene regulatory mechanisms may impact distinct cell types and regions of human  
62 hearts in health and disease. Although recent single cell genomic tools provide the  
63 opportunity to interrogate *cis*-regulatory elements at single cell resolution<sup>16-20</sup>, their  
64 application to mammalian hearts has been limited to a few adult and fetal mouse  
65 hearts<sup>20,21</sup>. Thus, to comprehensively investigate *cis*-regulatory elements in the specific

66 cell types of the human heart, we profiled chromatin accessibility in ~80,000 heart cells  
67 using single nucleus ATAC-seq (snATAC-seq)<sup>17,18</sup> and created a comprehensive cardiac  
68 cell atlas of cCREs annotated by cell type and putative target genes. Integration of these  
69 data with single nucleus RNA-seq datasets from matched specimens revealed gene  
70 regulatory programs in nine major cardiac cell types. Using this human cardiac cCRE  
71 atlas, we further observed the remodeling of cell type-specific candidate enhancers during  
72 heart failure and the enrichment of cardiovascular disease-associated genetic variants in  
73 cCREs of specific cell types. Finally, we showed that a cardiomyocyte-specific enhancer  
74 harboring risk variants for atrial fibrillation is necessary for cardiomyocyte *KCNH2*  
75 expression and regulation of cardiac action potential repolarization.

76

## 77 **RESULTS**

78

### 79 **Single nucleus analysis of chromatin accessibility and transcriptome in adult** 80 **human hearts**

81

82 To assess the accessible chromatin landscape of distinct cardiovascular cell types, we  
83 performed snATAC-seq<sup>17</sup>, also known as sciATAC-seq<sup>18</sup>, on all cardiac chambers from  
84 four adult human hearts without known cardiovascular disease (Supplemental Table I).  
85 We obtained accessible chromatin profiles for 79,515 nuclei, with a median of 2,682  
86 fragments mapped per nucleus (Figure 1A, B, Supplemental Figure I, Supplemental Table  
87 II). We also performed single nucleus RNA-seq (snRNA-seq) for a subset of the above  
88 heart samples to complement the accessible chromatin data and obtained 35,936 nuclear  
89 transcriptomes, with a median of 2,184 unique molecular identifiers (UMIs) and 1,286  
90 genes detected per nucleus (Figure 1A, C, Supplemental Figure II-A-F, Supplemental  
91 Table III). Using SnapATAC<sup>22</sup> and Seurat<sup>23</sup>, we identified nine clusters from snATAC-seq  
92 (Figure 1B) and twelve major clusters from snRNA-seq (Figure 1C, Supplemental Figure  
93 II-G, H), which were annotated based on chromatin accessibility at promoter regions or  
94 expression of known lineage-specific marker genes, respectively<sup>9,10</sup> (Figure 1D, E,  
95 Supplemental Table IV). For example, chromatin accessibility and gene expression of  
96 atrial and ventricular cardiomyocyte markers such as *NPPA* and *MYH7*<sup>24</sup> were used to

97 classify these two cardiomyocyte subtypes (Figure 1D, E). Although gene expression  
98 patterns of lineage markers strongly correlated with accessibility at promoter regions  
99 across annotated cell types (Figure 1F) and single cell integration analysis<sup>23</sup> revealed  
100 93% concordance in annotation between snATAC-seq and snRNA-seq datasets  
101 (Supplemental Figure III, Supplemental Table III), some cellular sub-types identified from  
102 snRNA-seq including endocardial cells and myofibroblasts were not detected by snATAC-  
103 seq (Figure 1F). Additionally, atrial and ventricular cardiomyocyte nuclei from the left and  
104 right regions of the heart could be further clustered by transcriptome but not chromatin  
105 accessibility (Supplemental Figure II-I, J). We noted that cell type composition varied  
106 significantly between biospecimens and donors, highlighting the importance of single cell  
107 approaches to limit biases due to cell proportion differences in bulk assays (Supplemental  
108 Figure IV, Supplemental Tables II and III). In summary, we identified and annotated  
109 cardiac cell types using both chromatin accessibility and nuclear transcriptome profiles.

110

### 111 **Identification of candidate *cis*-regulatory elements (cCREs) in distinct cell types of** 112 **the human heart**

113

114 To discover the cCREs in each cell type of the human heart, we aggregated snATAC-seq  
115 data from nuclei comprising each cell cluster individually and determined accessible  
116 chromatin regions with MACS2<sup>25</sup>. We then merged the peaks from all nine cell clusters  
117 into a union of 287,415 cCREs, which covered 4.7% of the human genome (Figure 2A,  
118 Supplemental Table V). 67.0% of the cCREs identified in the current study overlapped  
119 previously annotated cCREs from a broad spectrum of human tissues and cell lines<sup>26,27</sup>  
120 (Supplemental Figure V-A), and the union of heart cCREs captured 98.6% and 95.4% of  
121 candidate human heart enhancers reported in two previous bulk studies<sup>12,14</sup>  
122 (Supplemental Figure V-B, C). Furthermore, 75% of cCREs in the union were at least 2  
123 kbp away from annotated promoter regions, and 19,447 displayed high levels of cell type-  
124 specificity (Figure 2B, Supplemental Table VI). Gene ontology analysis<sup>28</sup> revealed that  
125 these cell type-specific cCREs were proximal to genes involved in relevant biological  
126 processes, including collagen fibril organization for cardiac fibroblast-specific cCREs  
127 (K1), and myofibril organization for ventricular cardiomyocyte-specific cCREs (K2, Figure

128 2C, Supplemental Table VII). Employing chromVAR<sup>29</sup> (Supplemental Table VIII) and  
129 HOMER<sup>30</sup> (Supplemental Table IX), we detected cell type-dependent enrichment for 231  
130 transcription factor binding signatures, such as MEF2A/B, NKX2.5, and THR- $\beta$  sequence  
131 motifs in cardiomyocyte-specific cCREs and TCF21 motifs in cardiac fibroblast-specific  
132 cCREs (Figure 2D, E). To discover the transcription factors that may bind to these sites,  
133 we combined corresponding snRNA-seq data with sequence motif enrichments to  
134 correlate expression of these transcription factors with motif enrichment patterns across  
135 cell types (Figure 2F). As an example, we found strong enrichment of the binding motif  
136 for the macrophage transcription factor SPI1/PU.1<sup>31</sup> in macrophage-specific cCREs, and  
137 *SPI1* was exclusively expressed in macrophages (Figure 2F, Supplemental Tables IV and  
138 X). In addition, we observed that transcription factor family members were expressed in  
139 cell type-specific combinations. For instance, while GATA family members displayed  
140 similar motif enrichment patterns across sets of cell type-specific cCREs, we discovered  
141 that endothelial cells and cardiac fibroblasts expressed *GATA2* and *GATA6*, respectively,  
142 whereas cardiomyocytes expressed both *GATA4* and *GATA6*, and endocardial cells  
143 expressed *GATA2*, *GATA4*, and *GATA6* (Figure 2F, Supplemental Tables IV and X). In  
144 summary, these results establish a resource of candidate *cis*-regulatory elements for  
145 interrogation of cardiac cell type-specific gene regulatory programs.

146

### 147 **Cardiac cell type-specific gene regulatory programs implicated in chamber-** 148 **specific structure and function**

149

150 Each cardiac chamber performs a unique role that is crucial to system-level heart  
151 function<sup>32</sup>. To investigate the gene regulatory programs underlying chamber-specific  
152 gene expression and cellular functions in distinct cardiac cell types, we tested cCREs for  
153 differential accessibility across five of the most abundant cell types of the heart:  
154 cardiomyocytes, cardiac fibroblasts, endothelial cells, smooth muscle cells, and  
155 macrophages. We discovered 16,451 differentially accessible (DA) cCREs between  
156 pooled atria and ventricles, the majority of which were detected in cardiomyocytes (Figure  
157 3A-C, Supplemental Table X). Specifically, 11,159 cCREs displayed differential  
158 accessibility between right atrium and right ventricle and 12,962 cCREs exhibited



159 differential accessibility between left atrium and left ventricle (Supplemental Figure VI-A-  
160 C, Supplemental Table X). Comparing the left and right sides of the heart, we identified  
161 101 DA cCREs between the right and left ventricle (Supplemental Figure VI-D), and 2,687  
162 DA cCREs between left and right atria, which in contrast to comparisons between atria  
163 and ventricles were found primarily in cardiac fibroblasts (Supplemental Figure VI-E,  
164 Supplemental Table X).

165

166 Utilizing co-accessibility analysis<sup>33</sup> to link distal DA cCREs (~88% of all DA cCREs) to  
167 their putative target genes (Supplemental Table XI, median distance: 88.7 kbp), we  
168 observed that distal DA cCREs in cardiomyocytes between atria and ventricles were  
169 associated with chamber-specific gene expression of their putative target genes (Figure  
170 3D, Supplemental Figure VI-B-E, Supplemental Table XII), and genes near these DA  
171 cCREs were enriched for chamber-specific biological processes (Figure 3E,  
172 Supplemental Figure VI-B-E, Supplemental Table XIII). Specifically, distal DA cCREs with  
173 higher accessibility in atrial cardiomyocytes were associated with genes such as *PITX2*,  
174 a transcriptional regulator of cardiac atrial development, as well as the ion channel subunit  
175 *SCN5A* which regulates cardiomyocyte action potential (Figure 3E, Supplemental Table  
176 XIII). Furthermore, we found distal DA cCREs with higher accessibility in atrial  
177 cardiomyocytes at the *HAMP* gene locus, which encodes a key regulator of ion  
178 homeostasis and was recently described as a potential novel cardiac gene in the right  
179 atrium by single nucleus transcriptomic analysis<sup>9,10</sup>. Conversely, genes near distal DA  
180 cCREs with higher accessibility in ventricular cardiomyocytes were enriched for biological  
181 processes such as trabecula formation and ventricular cardiac muscle cell differentiation.  
182 For example, several distal DA cCREs with increased accessibility in ventricular  
183 cardiomyocytes compared to atrial cardiomyocytes were linked to the promoter region of  
184 *MYL2*, which encodes the ventricular isoform of myosin light chain 2<sup>34</sup> (Figure 3F,  
185 Supplemental Table IV), a regulator of ventricular cardiomyocyte sarcomere function.

186

187 Additionally, analysis of distal DA cCREs in cardiac fibroblasts revealed that putative  
188 target genes were involved in distinct biological processes between right and left atria. In  
189 particular, we found that DA cCREs with higher accessibility in right atrial cardiac



190 fibroblasts were proximal to genes involved in heart development, heart growth, and tube  
191 development, whereas DA cCREs with higher accessibility in left atrial cardiac fibroblasts  
192 were adjacent to genes involved in biological processes such as wound healing and  
193 vasculature development (Supplemental Figure VI-E, Supplemental Table XIII). We  
194 further found a cardiac fibroblast-specific DA cCRE with higher accessibility in left atria at  
195 the fibrinogen *FN1* gene locus, potentially indicating a more activated fibroblast state<sup>9,35</sup>.  
196 Supporting these findings, we identified several other DA cCREs with higher accessibility  
197 in left atrial cardiac fibroblasts adjacent to genes involved in generation of extracellular  
198 matrix (ECM) such as *MMP2* and *FBLN2* (Supplemental Table XIII). These observations  
199 are consistent with previous findings that a higher fraction of ECM is produced in  
200 fibroblasts of the left atrium<sup>9</sup>.

201  
202 Using motif enrichment analysis, we inferred candidate transcriptional regulators involved  
203 in chamber-specific cellular specialization, including TBX5, GATA4, and TGIF1 for atrial  
204 cardiomyocytes, and NFAT, ERRG, HAND1, and HAND2 for ventricular cardiomyocytes  
205 (Figure 3G, Supplemental Table XIV). While the TBX5 DNA binding motif was strongly  
206 enriched in both right and left atrial cardiomyocyte DA cCREs, the NFAT5 motif ranked  
207 highest in left ventricular cardiomyocyte DA cCREs and the TBX20 motif was strongly  
208 enriched in right ventricular cardiomyocyte DA cCREs (Supplemental Figure VI-B, C,  
209 Supplemental Table XIV). Furthermore, cardiac fibroblast DA cCREs with higher  
210 accessibility in the right atrium were enriched for the binding motif of forkhead  
211 transcription factors (Supplemental Figure VI-E), whereas cardiac fibroblast DA cCREs  
212 with higher accessibility in the left atrium were enriched for the homeobox transcription  
213 factor CUX1 motif (Supplemental Figure VI-E, Supplemental Table XIV). Altogether, we  
214 identified cCREs and candidate transcription factors associated with specific cardiac  
215 chambers, particularly within cardiomyocytes and cardiac fibroblasts.

216

### 217 **Cell type specificity of candidate enhancers associated with heart failure**

218

219 Recent large-scale studies profiling the H3K27ac histone modification in human hearts  
220 have uncovered candidate enhancers associated with heart failure<sup>14,16</sup>. However,

221 because these studies either examined heterogeneous bulk heart tissue<sup>14,16</sup> or focused  
222 solely on enriched cardiomyocytes<sup>15</sup>, it remains unclear what role, if any, additional  
223 cardiac cell types and cCREs may contribute to heart failure pathogenesis. Using our cell  
224 atlas of cardiac cCREs, we revealed the cell type specificity of candidate enhancers  
225 showing differential H3K27ac signal strength between human hearts from healthy donors  
226 and donors with dilated cardiomyopathy (heart failure)<sup>14</sup> (Figure 4, Supplemental Figure  
227 VII). We observed that a large fraction of candidate enhancers that displayed increased  
228 activity (45%) during heart failure were accessible primarily in cardiac fibroblasts (Figure  
229 4A, K2-4<sub>up</sub>, Supplemental Table XV), whereas a majority of those exhibiting decreased  
230 activity (67%) were accessible primarily in cardiomyocytes (Figure 4B, K1-3<sub>down</sub>,  
231 Supplemental Table XV). Candidate enhancers with increased activity in cardiac  
232 fibroblasts were proximal to genes involved in extracellular matrix organization and  
233 connective tissue development (Figure 4A, K2-4<sub>up</sub>, Supplemental Table XVI), whereas  
234 those exhibiting decreased activity in cardiomyocytes were proximal to genes involved in  
235 regulation of heart contraction and cation transport (Figure 4B, K1-3<sub>down</sub>, Supplemental  
236 Table XVI). For example, several of these cardiac fibroblast candidate enhancers were  
237 present at loci encoding the extracellular matrix proteins lumican (*LUM*) and decorin  
238 (*DCN*) and co-accessible with the promoters of these genes (Figure 4C). Consistent with  
239 these findings, both genes were primarily expressed in cardiac fibroblasts (Supplemental  
240 Table IV), and *LUM* has been reported to exhibit increased expression in failing hearts  
241 compared to control hearts<sup>14</sup>. On the other hand, several cardiomyocyte candidate  
242 enhancers displaying decreased activity in heart failure were co-accessible with the  
243 promoter region of *IRX4* (Figure 4D), which encodes a ventricle-specific transcription  
244 factor<sup>36</sup> and is specifically expressed in cardiomyocytes of the left ventricle (Supplemental  
245 Table IV).

246

247 To identify potential transcription factors regulating these pathologic responses during  
248 heart failure, we performed motif enrichment analysis in cell type-specific subsets of  
249 disease-associated candidate enhancers (Supplemental Table XVII). For candidate  
250 enhancers exhibiting increased activity in heart failure, we identified enrichment of not  
251 only bHLH motifs such as AP4 in cardiac fibroblast candidate enhancers which matched

252 previous bulk analysis<sup>14</sup> (Figure 4E, K2-4<sub>up</sub>), but also TEAD3 and MYF6 motifs in  
253 cardiomyocyte candidate enhancers (Figure 4E, K1<sub>up</sub>). Conversely, for candidate  
254 enhancers displaying decreased activity in heart failure, we observed enrichment of  
255 nuclear receptor motifs such as glucocorticoid response element (GRE) in cardiomyocyte  
256 candidate enhancers, which is consistent with previous findings<sup>14</sup> (Figure 4F, K1-3<sub>down</sub>),  
257 as well as other motifs which were not detected in bulk analyses, such as the bZIP  
258 transcription factor CEBPA for cardiac fibroblast candidate enhancers (Figure 4F, K4<sub>down</sub>).  
259 Thus, these results show that this cardiac cell atlas of cCREs may be used to assign  
260 disease-associated candidate enhancers from bulk assays to their affected cell types and  
261 infer transcriptional regulators involved in lineage-specific disease pathogenesis.

262

### 263 **Interpreting non-coding risk variants of cardiac diseases and traits**

264

265 Non-coding genetic variants contributing to risk of complex diseases are enriched within  
266 cCREs in a cell type-specific fashion<sup>20,37-40</sup>. To examine the enrichment of cardiovascular  
267 disease variants within cCREs active in specific cardiac cell types, we performed cell  
268 type-stratified LD (Linkage disequilibrium) score regression analysis<sup>41</sup> using GWAS  
269 summary statistics for cardiovascular diseases<sup>42-46</sup> (Figure 5A) and control traits  
270 (Supplemental Figure VIII, Supplemental Table XVIII). This analysis revealed significant  
271 enrichment of atrial fibrillation (AF)-associated variants in both atrial ( $Z = 3.25$ , FDR =  
272 0.02) and ventricular cardiomyocyte cCREs ( $Z = 3.77$ , FDR = 0.01), varicose vein-  
273 associated variants in endothelial cell cCREs ( $Z = 3.44$ , FDR = 0.01), and nominal  
274 enrichment of coronary artery disease-associated variants in cardiac fibroblast cCREs ( $Z$   
275 = 2.19, FDR = 0.20, Figure 5A).

276

277 Next, to identify likely causal AF risk variants in cardiomyocyte cCREs, we first determined  
278 the probability that variants were causal for AF (Posterior probability of association, PPA)  
279 at 111 known loci using Bayesian fine-mapping<sup>47</sup>. We then intersected fine-mapped AF  
280 variants with cCREs and identified 38 variants with PPA > 10% in cardiomyocyte cCREs  
281 including previously reported variants at the *HCN4*<sup>12</sup> and *SCN10A/SCN5A*<sup>48</sup> loci  
282 (Supplemental Table XIX). We further prioritized AF variants for molecular

283 characterization based on their overlap with cCREs that were primarily accessible in  
284 cardiomyocytes, evolutionarily conserved, co-accessible with promoters of genes  
285 expressed in cardiomyocytes and marked by H3K27ac in human pluripotent stem cell  
286 (hPSC)-derived cardiomyocytes<sup>49</sup> during *in vitro* differentiation (Figure 5B). From this  
287 analysis, we discovered a cCRE in the second intron of the potassium channel gene  
288 *KCNH2* (*HERG*) which was co-accessible with the *KCNH2* promoter (Figure 5C) and  
289 harbored two variants, rs7789146 and rs7789585, with a combined PPA of 28% (Figure  
290 5C, Supplemental Figure IX-A). This cCRE appeared to be activated during hPSC-  
291 cardiomyocyte differentiation as evidenced by an increase in H3K27ac signal that  
292 correlated with *KCNH2* expression (Figure 5C). Supporting its *in vivo* role in regulating  
293 gene expression in mammalian hearts, a genomic region (hs2192)<sup>50</sup> containing this cCRE  
294 was previously shown to drive LacZ reporter expression in mouse embryonic hearts<sup>50</sup>  
295 (Figure 5D).

296

### 297 **A cardiomyocyte enhancer of *KCNH2* is affected by non-coding risk variants** 298 **associated with atrial fibrillation**

299

300 To investigate whether these AF variants may affect enhancer activity and thereby  
301 regulate *KCNH2* expression and cardiomyocyte electrophysiologic function, we initially  
302 carried out reporter assays using a hPSC cardiomyocyte model system. Results from  
303 these studies confirmed that in D15 hPSC-cardiomyocytes, the *KCNH2* enhancer  
304 carrying the homozygous rs7789146-G/rs7789585-G AF risk allele displayed significantly  
305 weaker enhancer activity than when containing the non-risk variants (Figure 5E,  
306 Supplemental Figure IX-B), thus supporting the functional significance of these AF  
307 variants. We next used CRISPR/Cas9 genome editing strategies to remove the enhancer  
308 and performed qPCR and electrophysiologic assays to examine its role in *KCNH2*  
309 expression and function. Supporting the aforementioned findings, CRISPR/Cas9 genome  
310 deletion of this cCRE in hPSC-cardiomyocytes resulted in decreased *KCNH2* expression  
311 in an enhancer dosage-dependent manner (Figure 5F, Supplemental Figure IX-C).  
312 Similar to human cardiomyocytes with loss of *KCNH2* function due to mutations in the  
313 *KCNH2* coding sequence<sup>51</sup> or gene knockdown<sup>52</sup>, cellular electrophysiologic studies

314 demonstrated that these cCRE-deleted hPSC cardiomyocytes displayed a significantly  
315 prolonged action potential duration (Figure 5G, H), thus suggesting that cardiac  
316 repolarization abnormalities in atrial cardiomyocytes may lead to AF in an analogous  
317 manner to ventricular arrhythmias due to long QT syndrome<sup>52</sup>. Taken together, these  
318 results highlight the utility of this single cell atlas for assigning non-coding cardiovascular  
319 disease risk variants to distinct cell types and affected cCREs, and functionally  
320 interrogating how these variants may contribute to cardiovascular disease risk.

## 321 DISCUSSION

322

323 The limited ability to interrogate cell type-specific gene regulatory programs in the human  
324 heart has been a major barrier for understanding molecular mechanisms of  
325 cardiovascular traits and diseases. Here, we report a cell type-resolved atlas of cCREs in  
326 the human heart, which was ascertained by profiling accessible chromatin in individual  
327 nuclei from all four chambers of multiple human hearts and includes both cell type-specific  
328 and heart chamber-specific cCREs. Furthermore, we characterized candidate *cis*-  
329 regulatory elements in different cardiac cell types in the human heart and delineated  
330 differences of gene regulatory programs underlying different regions/structures of the  
331 heart. In particular, we observed chamber-specific differences in chromatin accessibility  
332 between ventricles and atria as well as left and right atria but notably detected few  
333 differences between left and right ventricles. This finding is consistent with a recent single  
334 nucleus RNA-seq study in human hearts which found few differentially expressed genes  
335 between left and right ventricles<sup>10</sup>.

336

337 We further highlight the utility of this atlas of heart cCREs to provide new insight into  
338 aberrant gene regulation during cardiovascular pathology. To this end, we delineated the  
339 cell type-specificity of enhancers which were differentially active between healthy and  
340 failing heart tissue<sup>14</sup> and identified additional transcription factors that may be involved in  
341 the pathogenesis of specific cell types during heart failure. Such cell type-specific analysis  
342 is particularly important in the context of heart failure because cellular composition can  
343 differ between diseased and control hearts<sup>15,53</sup>. This change in cellular composition may  
344 in part explain the cell type bias that we observed between candidate enhancers  
345 exhibiting increased and decreased activity during heart failure (i.e. cardiac fibroblasts  
346 and cardiomyocytes, respectively). However, due to the large differences in H3K27ac  
347 signal, we suspect that measured changes in candidate enhancer activity could be due  
348 to a combination of both enhancer remodeling and shift in cell type composition. Thus,  
349 future studies profiling snATAC-seq and H3K27ac in parallel from the same cardiac  
350 sample or novel approaches to profile histone modifications in single nuclei<sup>54,55</sup> will

351 provide greater insight into the extent of changes in chromatin accessibility and enhancer  
352 activity in individual cardiac cell types from diseased hearts.

353

354 Finally, we show how this atlas can be used to not only assign non-coding genetic variants  
355 associated with cardiovascular disease risk to cCREs in specific cardiac cell types, but  
356 also illuminate their cellular and molecular consequences. In particular, we discovered  
357 significant enrichment of AF-associated variants within cardiomyocyte cCREs and  
358 functionally interrogated one of these cCREs by demonstrating its role in regulating  
359 *KCNH2* expression and cardiomyocyte repolarization. Similar to electrophysiologic  
360 phenotypes of human cardiomyocytes exhibiting *KCNH2* loss of function<sup>51,52</sup>, hPSC-  
361 cardiomyocytes harboring deletions of this cCRE displayed action potential prolongation,  
362 suggesting that cardiac repolarization abnormalities may contribute to atrial fibrillation,  
363 possibly through similar mechanisms as to how they may contribute ventricular  
364 arrhythmias<sup>51</sup>. On the other hand, we found only nominal enrichment of variants  
365 associated with coronary artery disease in fibroblasts and no enrichment of variants  
366 associated with heart failure in any cardiac cell type. These findings may reflect the  
367 heterogeneous etiologies of cardiovascular diseases and, in the case of heart failure, the  
368 limited number of currently known risk loci<sup>42</sup>. Future GWAS in large cohorts with detailed  
369 phenotyping, including biobanks such as the UK Biobank<sup>56</sup> and the BioBank Japan  
370 Project<sup>57</sup> and whole genome sequencing efforts such as the NHLBI Trans-Omics for  
371 Precision Medicine (TOPMed) program<sup>58</sup>, will help identify and refine disease association  
372 signals. Therefore, this atlas of cardiac cCREs will be a valuable resource for continued  
373 discovery of regulatory elements, target genes, and specific cell types that may be  
374 affected by non-coding cardiovascular genetic variants.

375 In summary, we created a human heart cell atlas of >287,000 cCREs, which may serve  
376 as a reference to further expand our knowledge of gene regulatory mechanisms  
377 underlying cardiovascular disease. To facilitate distribution of these data, we created a  
378 web portal at: <http://catlas.org/humanheart>. Integrating this resource with genomic and  
379 epigenomic clinical cardiac datasets, we built a systematic framework to interrogate how  
380 *cis*-regulatory elements and genetic variants might contribute to cardiovascular diseases  
381 such as heart failure or atrial fibrillation. Overall, such information will have great potential



382 to provide new insight into the development of future cardiac therapies that are tailored  
383 to affected cell types and thus optimized for treating specific cardiovascular diseases.

384 **ACKNOWLEDGEMENTS**

385 We thank B. Li for bioinformatics support. We thank K. Jepsen and the UCSD IGM  
386 Genomics Center for sequencing the snRNA-seq libraries. We thank the QB3 Macrolab  
387 at UC Berkeley for purification of the Tn5 transposase.

388

389 **SOURCES OF FUNDING**

390 This work was supported by the Ludwig Institute for Cancer Research (B.R.), and the  
391 National Institutes of Health (1UM1HL128773-01 to N.C., B.R., U01 HL126273 and R01  
392 HL137100 to A.D.M.). J.D.H. was supported in part by a Ruth L. Kirschstein Institutional  
393 National Research Service Award T32 GM008666 from the National Institute of General  
394 Medical Sciences. Work at the Center for Epigenomics was supported in part by the UC  
395 San Diego School of Medicine.

396

397 **AUTHOR CONTRIBUTIONS**

398 J.D.H., S.P., N.C.C., and B.R. conceived the project. J.D.H. and J.B. carried out snATAC-  
399 seq and snRNA-seq library preparation with help from X.H. F.Z. performed luciferase  
400 assay, CRISPR–Cas9 knockout, *in vitro* cardiomyocyte differentiation and quantitative  
401 PCR of the corresponding cell lines. T.W. and F.Z. performed action potential  
402 measurement. J.D.H., O.P., J.B., K.Z., J.C., Y.L., and S.P. performed data analysis. O.P.  
403 created the web portal. X.H., E.F., Y.Z., A.W., A.D.M., K.J.G., and N.C.C. contributed to  
404 experimental design and computational analyses. J.D.H., S.P., N.C.C., and B.R. wrote  
405 the manuscript. All authors edited and approved the manuscript.

406

407 **DISCLOSURES**

408 B.R. is a shareholder and consultant of Arima Genomics, Inc. K.J.G is a consultant of  
409 Genentech, and shareholder in Vertex Pharmaceuticals. A.D.M. is a cofounder and  
410 Scientific Advisor to Insilicomed, Inc. and Vektor Medical, Inc. These relationships have  
411 been disclosed to and approved by the UCSD Independent Review Committee.

412 **FIGURES**

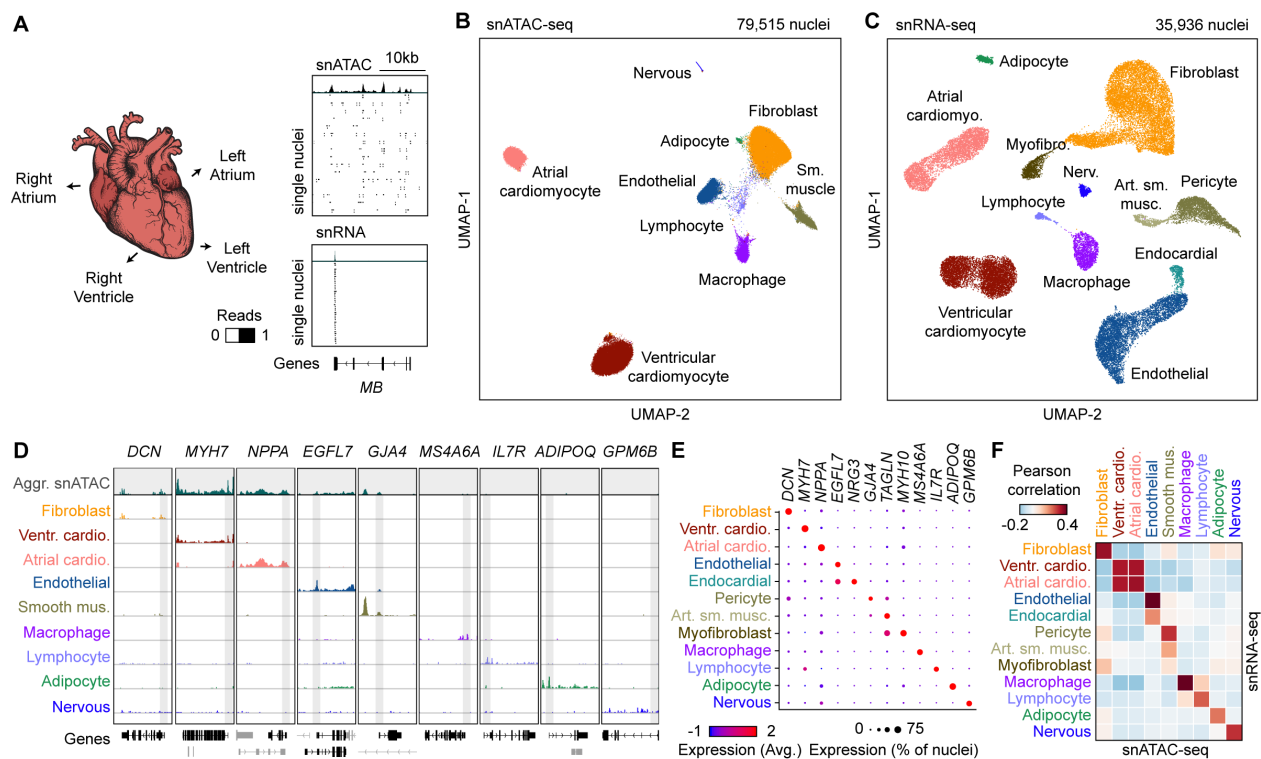

413

414

415 **Figure 1: Single nucleus chromatin accessibility and transcriptome profiling of**

416 **human hearts. A)** snATAC-seq and snRNA-seq were performed on nuclei isolated from

417 cardiac chambers from four human donors without cardiovascular pathology. snATAC-

418 seq: n = 4 (left ventricle), n = 4 (right ventricle), n = 3 (left atrium), n = 2 (right atrium),

419 snRNA-seq: n = 2 (left ventricle), n = 2 (right ventricle), n = 2 (left atrium), n = 1 (right

420 atrium). **B)** Uniform manifold approximation and projection (UMAP)<sup>59</sup> and clustering

421 analysis of snATAC-seq data reveals nine clusters. Each dot represents a nucleus

422 colored by cluster identity. **C)** Uniform manifold approximation and projection (UMAP)<sup>59</sup>

423 and clustering analysis of snRNA-seq data reveals 12 major clusters. Each dot represents

424 a nucleus colored by cluster identity. Nerv. = Nervous. Art. sm. musc. = arterial smooth

425 muscle. **D)** Genome browser tracks<sup>60</sup> of aggregate chromatin accessibility profiles at

426 selected representative marker gene examples for individual clusters and for all nuclei

427 pooled together into an aggregated heart dataset (top track, grey). Black genes below

428 tracks represent the indicated marker genes, non-marker genes are greyed. **E)** Dot plot

429 illustrating expression of representative marker gene examples in individual snRNA-seq

430 clusters. **F)** Heatmap illustrating the correlation between clusters defined by chromatin  
431 accessibility and transcriptomes. Pearson correlation coefficients were calculated  
432 between chromatin accessibility at cCREs within 2 kbp of annotated promoter regions<sup>61</sup>  
433 and expression of the corresponding genes for each cluster.

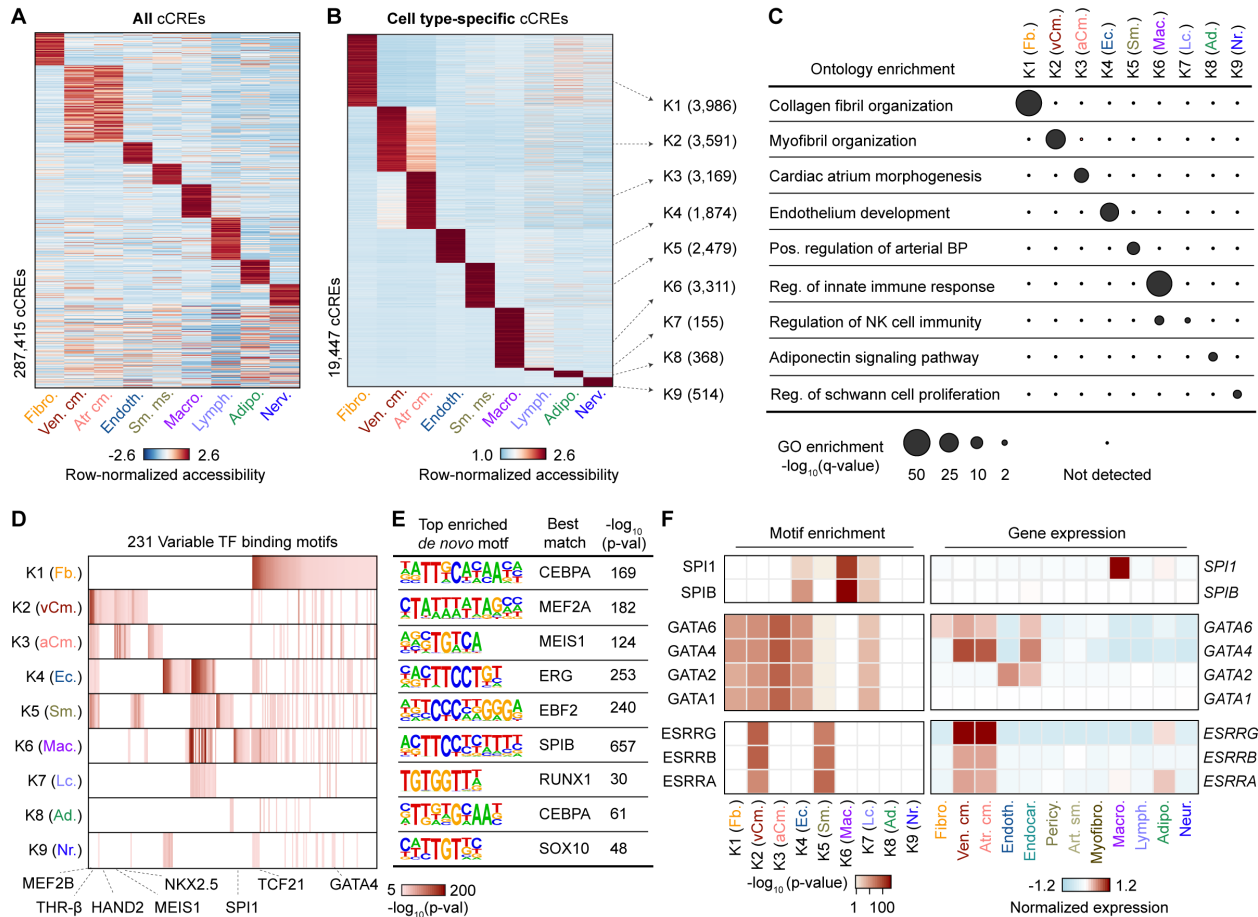

434

435

436 **Figure 2: Characterization of gene regulatory programs in cardiac cell types. A)**

437 Heatmap illustrating row-normalized chromatin accessibility values for the union of

438 287,415 cCREs. K-means clustering was performed to group cCREs based on relative

439 accessibility patterns. **B)** Heatmap showing row-normalized chromatin accessibility of

440 19,447 cell type-specific cCREs (FDR < 0.01 after Benjamini-Hochberg correction;

441 log<sub>2</sub>(fold change) > 0). K-means clustering was performed to group cCREs based on

442 relative accessibility patterns. Number of cCREs per K can be found in brackets. **C)**

443 GREAT ontology analysis<sup>28</sup> of cell type-specific cCREs. Q-value for enrichment indicates

444 Bonferroni adjusted p-value. **D, E)** Transcription factor motif enrichment<sup>30</sup> for known (**D**)

445 and *de novo* motifs (**E**) within cell type-specific cCREs. The heatmap in (**D**) shows motifs

446 with enrichment p-value < 10<sup>-5</sup> in at least one cluster. For *de novo* transcription factor

447 motifs (**E**) the best matches for the top motifs are displayed. Statistical test for motif

448 enrichment: hypergeometric test. P-values were not corrected for multiple testing. **F)**

449 Combination of transcription factor motif enrichment and gene expression shows cell  
450 type-specific roles for members of transcription factor families. Displayed are heatmaps  
451 for known motif enrichment in cell type-specific cCREs (left) and gene expression across  
452 clusters (right). (Fb. = Fibroblast, vCm. = Ventricular Cardiomyocyte, aCm. = Atrial  
453 Cardiomyocyte, Ec. = Endothelial, Sm. = Smooth Muscle, Mac. = Macrophage, Lc. =  
454 Lymphocyte, Ad. = Adipocyte, Nr. = Nervous).

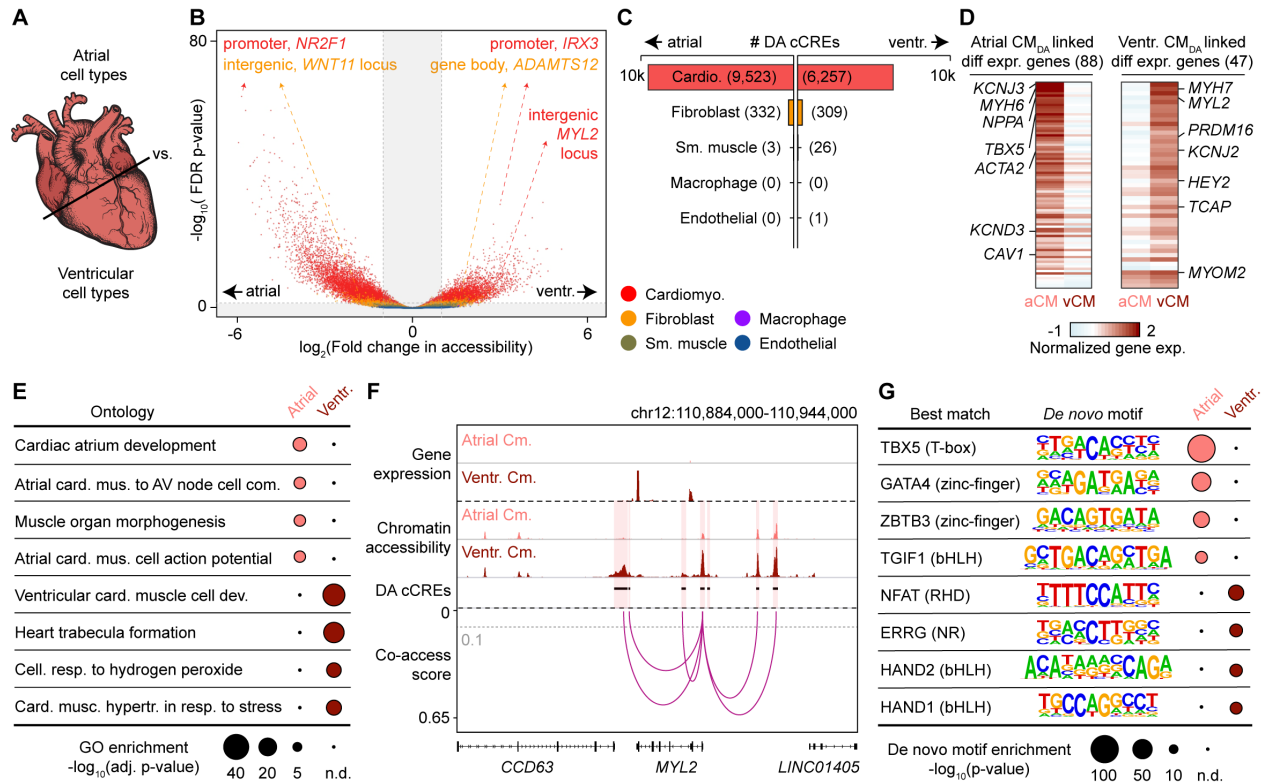

455

456

457 **Figure 3: Cardiomyocyte cCREs display chamber-dependent differences in**

458 **chromatin accessibility. A)** Scheme for comparison of major cell types across heart

459 chambers. All atrial as well as all ventricular datasets were combined, and corresponding

460 cell types compared. **B)** Volcano plot showing differentially accessible (DA) candidate *cis*-

461 regulatory elements (cCREs) in each cell type between atria and ventricles. Each dot

462 represents a cCRE and the color indicates the cell type. cCREs with  $\log_2(\text{fold change}) >$

463 1 and  $\text{FDR} < 0.05$  after Benjamini-Hochberg correction (outside the shaded area) were

464 considered as DA. **C)** DA cCREs between atria and ventricles were detected almost

465 exclusively in cardiomyocytes and fibroblasts. The numbers of DA cCREs are listed in

466 brackets. **D)** Heatmaps showing normalized gene expression levels of differentially

467 expressed genes between atrial (aCM) and ventricular cardiomyocytes (vCM) that were

468 linked by co-accessibility to distal DA cCREs that were more accessible in atrial

469 cardiomyocytes (Atrial CM<sub>DA</sub>) or ventricular cardiomyocytes (Ventr. CM<sub>DA</sub>), respectively.

470 **E)** GREAT ontology analysis<sup>28</sup> of DA cCREs between atrial and ventricular

471 cardiomyocytes. P-values shown are Bonferroni adjusted (n.d.: not detected). **F)** Genome

472 browser tracks<sup>60</sup> showing chromatin accessibility and gene expression in atrial and



473 ventricular cardiomyocytes as well as DA cCREs that were co-accessible with the  
474 promoter of *MYL2*. Grey dotted line indicates co-accessibility threshold ( $> 0.1$ ). Co-  
475 accessible DA cCREs are indicated by a red shaded box and the promoter region of  
476 *MYL2* is indicated by a grey shaded box. **G)** Transcription factor motif enrichment  
477 analysis<sup>30</sup> of DA cCREs between atrial and ventricular cardiomyocytes. The best matches  
478 for the top *de novo* motifs (score  $> 0.7$ ) are shown. Statistical test for motif enrichment:  
479 hypergeometric test. P-values were not corrected for multiple testing (n.d.: not detected).

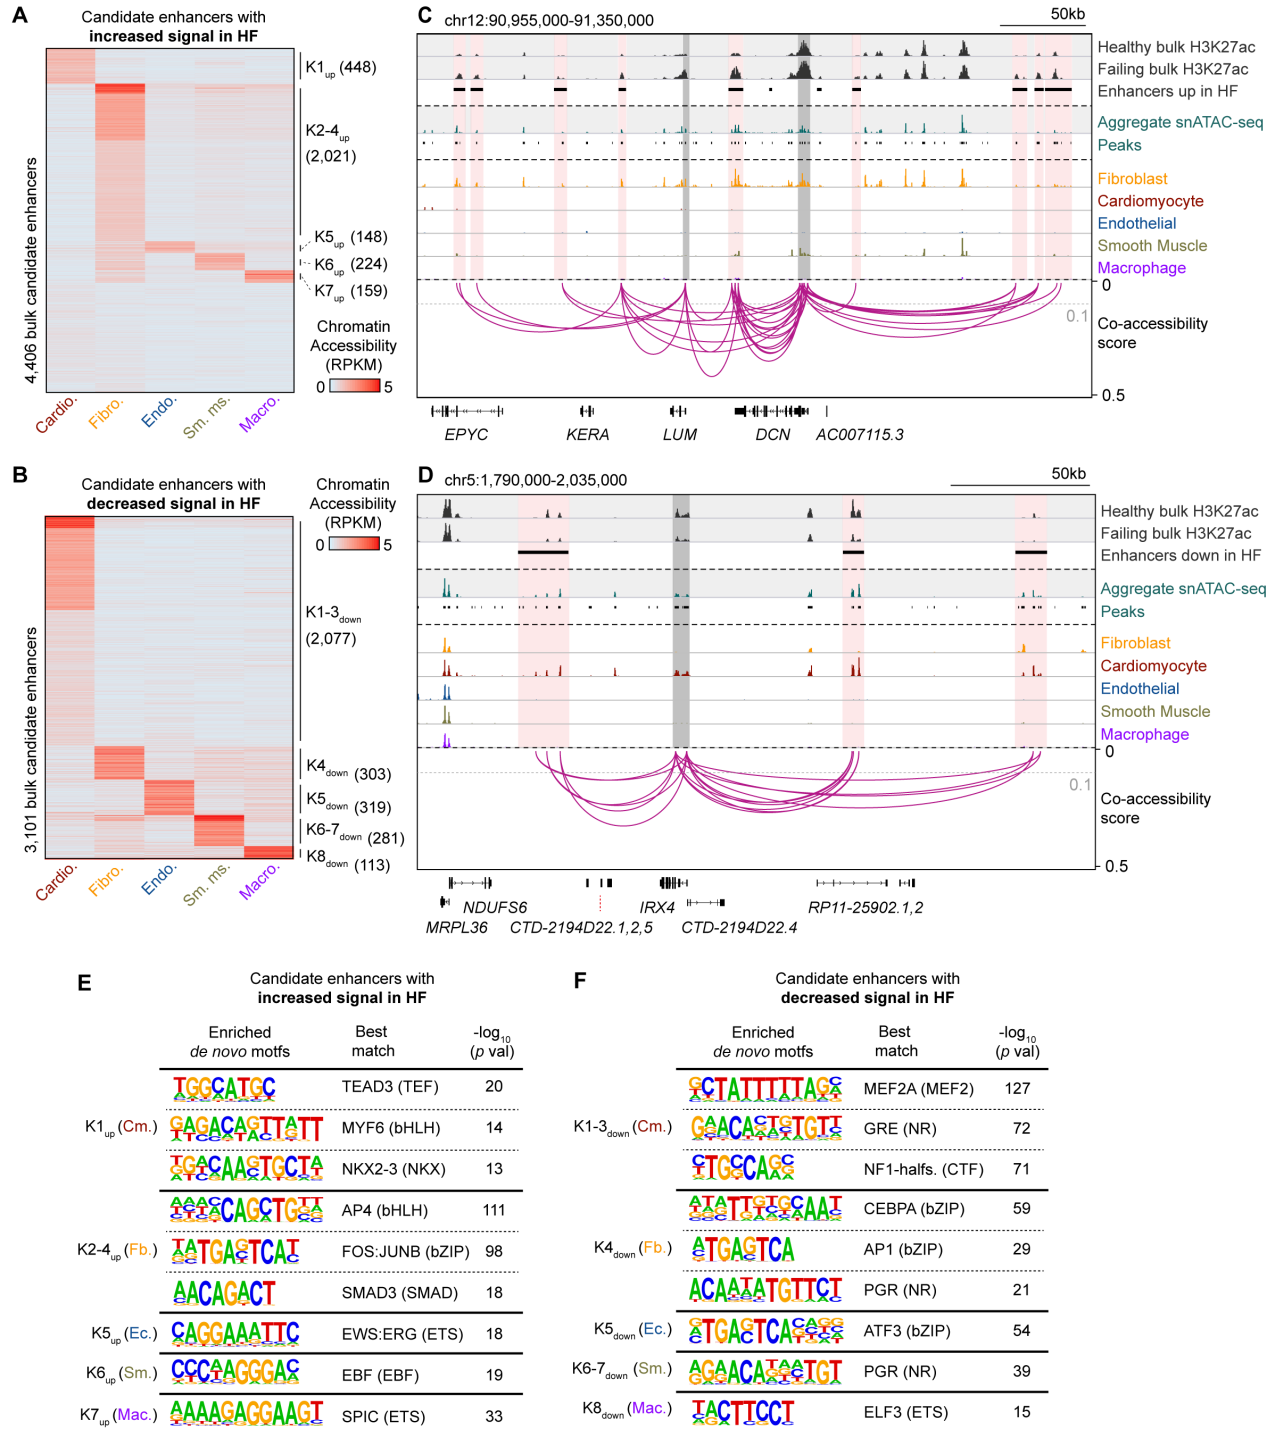

480

481

482 **Figure 4: Cell type specificity of candidate enhancers associated with heart failure.**

483 **A)** Cell type-specificity of 4,406 candidate enhancers with increased H3K27ac signal in

484 failing left ventricles<sup>14</sup>. Heatmap displays cell type-resolved chromatin accessibility RPKM

485 (reads per kilobase per million mapped reads) values for cell types from left ventricular

486 snATAC-seq datasets. Candidate enhancers were grouped based on chromatin  
487 accessibility patterns across cell clusters using K-means. **B)** Cell type-specificity of 3,101  
488 candidate enhancers with decreased H3K27ac signal in failing left ventricles<sup>14</sup>. **C)**  
489 Genome browser tracks<sup>60</sup> showing several candidate enhancers with increased activity  
490 during heart failure (HF) that were primarily accessible in fibroblasts and co-accessible  
491 with the promoters of *LUM* and/or *DCN*. For visualization, linkages between cCREs within  
492 candidate enhancers and all gene promoters are shown (co-accessibility > 0.1, grey  
493 dotted line). Candidate enhancers co-accessible with gene promoters are indicated by  
494 red shaded boxes and promoter regions are indicated by grey shaded boxes. **D)** Genome  
495 browser tracks<sup>60</sup> showing several bulk candidate enhancers with decreased activity in  
496 heart failure that were primarily accessible in cardiomyocytes and co-accessible with the  
497 promoter of *IRX4*. **E, F)** Transcription factor motif enrichment<sup>30</sup> in the candidate  
498 enhancers with **(E)** increased and **(F)** decreased activity in failing left ventricles. Analysis  
499 was performed on the indicated K cluster(s) from panels **(A)** and **(B)** respectively. The  
500 best matches for selected *de novo* motifs (score > 0.7) are shown. Statistical test for motif  
501 enrichment: hypergeometric test. P-values were not corrected for multiple testing.

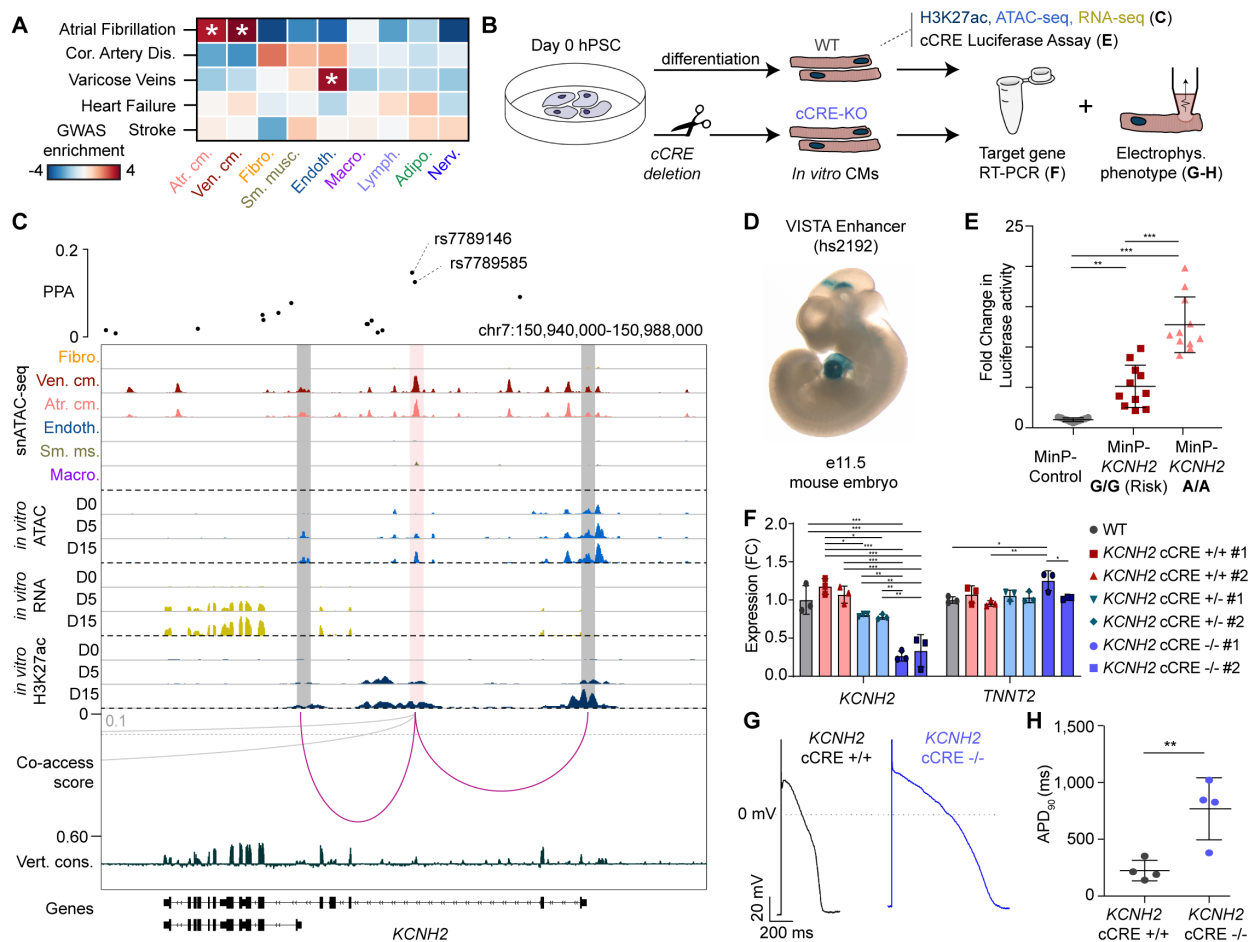

502

503

504 **Figure 5: Identification and characterization of atrial fibrillation-associated variants**

505 **at the *KCNH2* locus. A)** Enrichment of risk variants associated with cardiovascular

506 disease traits in genome wide association studies (GWAS) within cardiac cell type-

507 resolved cCREs. Displayed are z-scores, and these scores were also used to compute

508 one-sided p-values for enrichments that were corrected using the Benjamini Hochberg

509 procedure for multiple tests. \* = FDR < 0.05. **B)** Schematic of a cardiomyocyte

510 differentiation model used to profile candidate enhancer dynamics, gene expression, and

511 electrophysiologic phenotypes. hPSC = human pluripotent stem cell. **C)** Fine mapping<sup>47</sup>

512 and molecular characterization of two variants associated with atrial fibrillation (AF) in a

513 cardiomyocyte cCRE co-accessible with promoter regions of *KCNH2*. Genome browser

514 tracks<sup>60</sup> display cell type-resolved chromatin accessibility and co-accessibility from

515 snATAC-seq, as well as chromatin accessibility, H3K27ac signal, and gene expression

516 during hPSC-cardiomyocyte differentiation timepoints. D0 = day 0, D5 = day 5, D15 =

517 day15. For illustration, the co-accessibility track shows linkages between the AF variant-  
518 containing cCRE and annotated gene promoters (cutoff > 0.1, grey dotted line). The grey  
519 arc represents links to the promoter of *AOC1* which was not expressed. For the full locus  
520 see Supplemental Figure IX-A. PPA: Posterior probability of association<sup>47</sup>. **D)**  
521 Representative image of a transgenic mouse embryo showing LacZ reporter gene  
522 expression under control of a genomic region (hs2192, image downloaded from Vista  
523 database<sup>50</sup>, <https://enhancer.lbl.gov/>) that overlaps the variant-cCRE pair at the *KCNH2*  
524 locus. The picture for hs2192 was downloaded from the VISTA<sup>50</sup> database. **E)** Dot plot  
525 illustrating results of a dual luciferase reporter assay for the AF variant-harboring cCRE  
526 at the *KCNH2* locus in D15 cardiomyocytes. The genotype for both rs7789146 and  
527 rs7789585 was either G (homozygous rs7789146-G / rs7789585-G; risk) or A  
528 (homozygous rs7789146-A / rs7789585-A; non-risk). Each dot represents one  
529 transfection (three independent experiments). Data are displayed as mean +/- SD. \*\*\* p  
530 < 0.001, \*\* p < 0.01 (one-way ANOVA and Tukey post hoc test). MinP: minimal promoter.  
531 **F)** Bar chart showing fold changes in *KCNH2* and *TNNT2* expression for D25  
532 cardiomyocytes measured by qPCR after CRISPR/Cas9-mediated deletion of the variant-  
533 cCRE pair at the *KCNH2* locus. Each dot represents one independent cardiomyocyte  
534 differentiation. Data are displayed as mean +/- SD. \*\*\* p < 0.001, \*\* p < 0.01, \* p < 0.05,  
535 (one-way ANOVA and Tukey post hoc test); WT = unperturbed control, *KCNH2* cCRE +/+  
536 #1 & #2 = no guide RNA control clones #1 and #2; *KCNH2* cCRE +/- #1 & #2 =  
537 Heterozygous enhancer deletion clones #1 & #2; *KCNH2* cCRE -/- #1 & #2 =  
538 Homozygous enhancer deletion clones #1 & #2. **G)** Exemplary traces of action potential  
539 recordings in hPSC-derived cardiomyocytes at D25-35 for a control clone (*KCNH2* cCRE  
540 +/+ #1, left) and a clone with enhancer deletion (*KCNH2* cCRE -/- #1, right). **H)** Dot blot  
541 showing the quantification of APD<sub>90</sub> at 1 Hz pacing for 4 independent hPSC derived  
542 cardiomyocytes at D25-35 from a control clone (*KCNH2* cCRE +/+ #1) and an enhancer  
543 deletion clone (*KCNH2* cCRE -/- #1). \*\* p < 0.01 (unpaired two-sided t-test). APD<sub>90</sub>: action  
544 potential duration at 90% depolarization.

545 **SUPPLEMENTAL FIGURES**

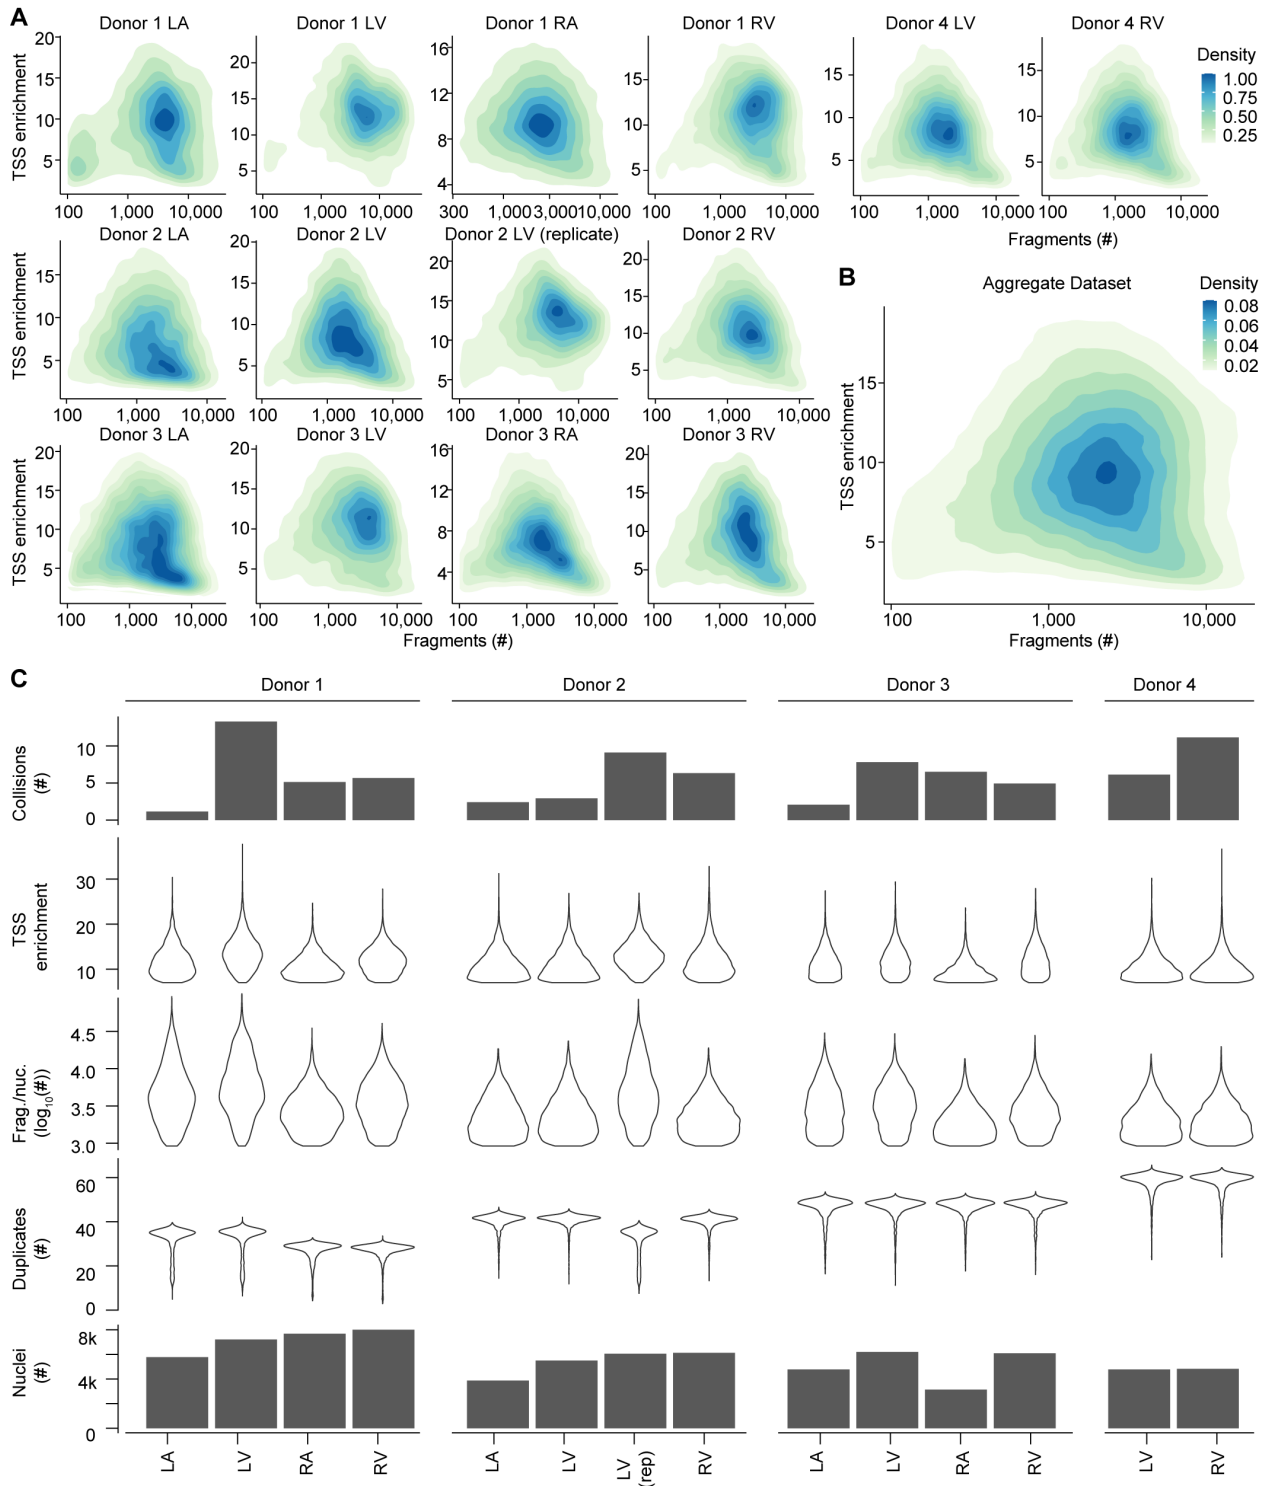

546

547

548 **Supplemental Figure I: Quality control for snATAC-seq datasets. A)** Density plots

549 showing enrichment of fragments at transcription start sites (TSS enrichment) versus

550 number of fragments per nucleus for each dataset. **B)** Density plot of TSS enrichment  
551 versus number of fragments for all datasets combined. **C)** Percentage of barcode  
552 collisions identified as heterotypic cell type collisions by Scrublet<sup>62</sup> (top row), TSS  
553 enrichment (second row), fragments per nucleus (third row), duplicate read percentage  
554 (fourth row), and number of nuclei passing quality control (bottom row) for each snATAC-  
555 seq dataset.



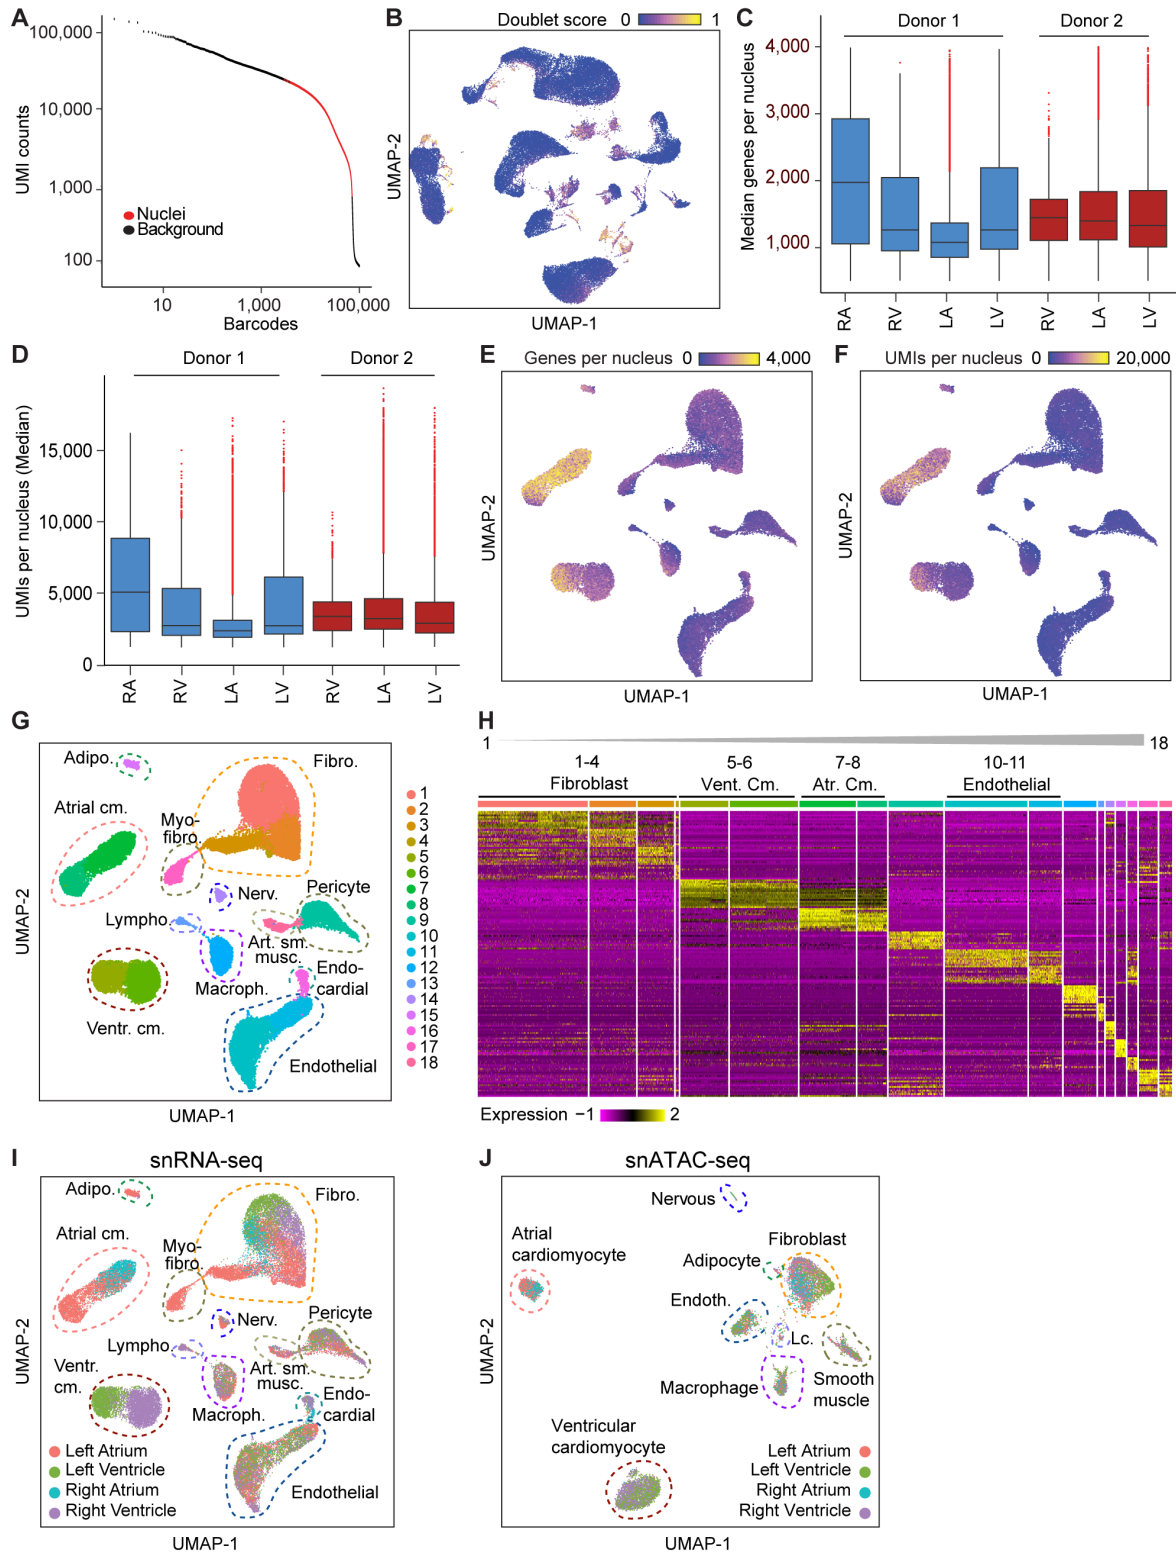

556

557

558 **Supplemental Figure II: Quality control for snRNA-seq datasets and annotation of**

559 **snRNA-seq clusters. A) Distribution of barcodes by unique molecular identifier (UMI)**

560 counts for nuclei (red; passing quality control) and background (black; not passing quality  
561 control) barcodes. **B)** Distribution of doublet scores for all snRNA-seq nuclei that passed  
562 initial Cell Ranger (10x Genomics) and Seurat<sup>23</sup> quality control. **C)** Median genes detected  
563 per nucleus for each snRNA-seq dataset. **D)** Median UMIs detected per nucleus for each  
564 snRNA-seq dataset. **E)** Distribution of genes per nucleus on final snRNA-seq UMAP<sup>59</sup>. **F)**  
565 Distribution of UMIs per nucleus on final snRNA-seq UMAP<sup>59</sup>. **G)** Initial Seurat<sup>23</sup> clustering  
566 result of snRNA-seq data showing 18 clusters, and dashed lines indicating final 12 major  
567 cell cluster annotations based on shared expression patterns (**H**). **H)** Differential gene  
568 expression heatmap showing top 10 differentially expressed genes for each initial cluster  
569 by Seurat<sup>23</sup>. Initial clusters were merged into major cell clusters based on shared gene  
570 expression patterns as indicated above the heatmap. **I, J)** UMAPs<sup>59</sup> showing chamber-  
571 of-origin for nuclei included in the final (**I**) snRNA-seq and (**J**) snATAC-seq datasets.

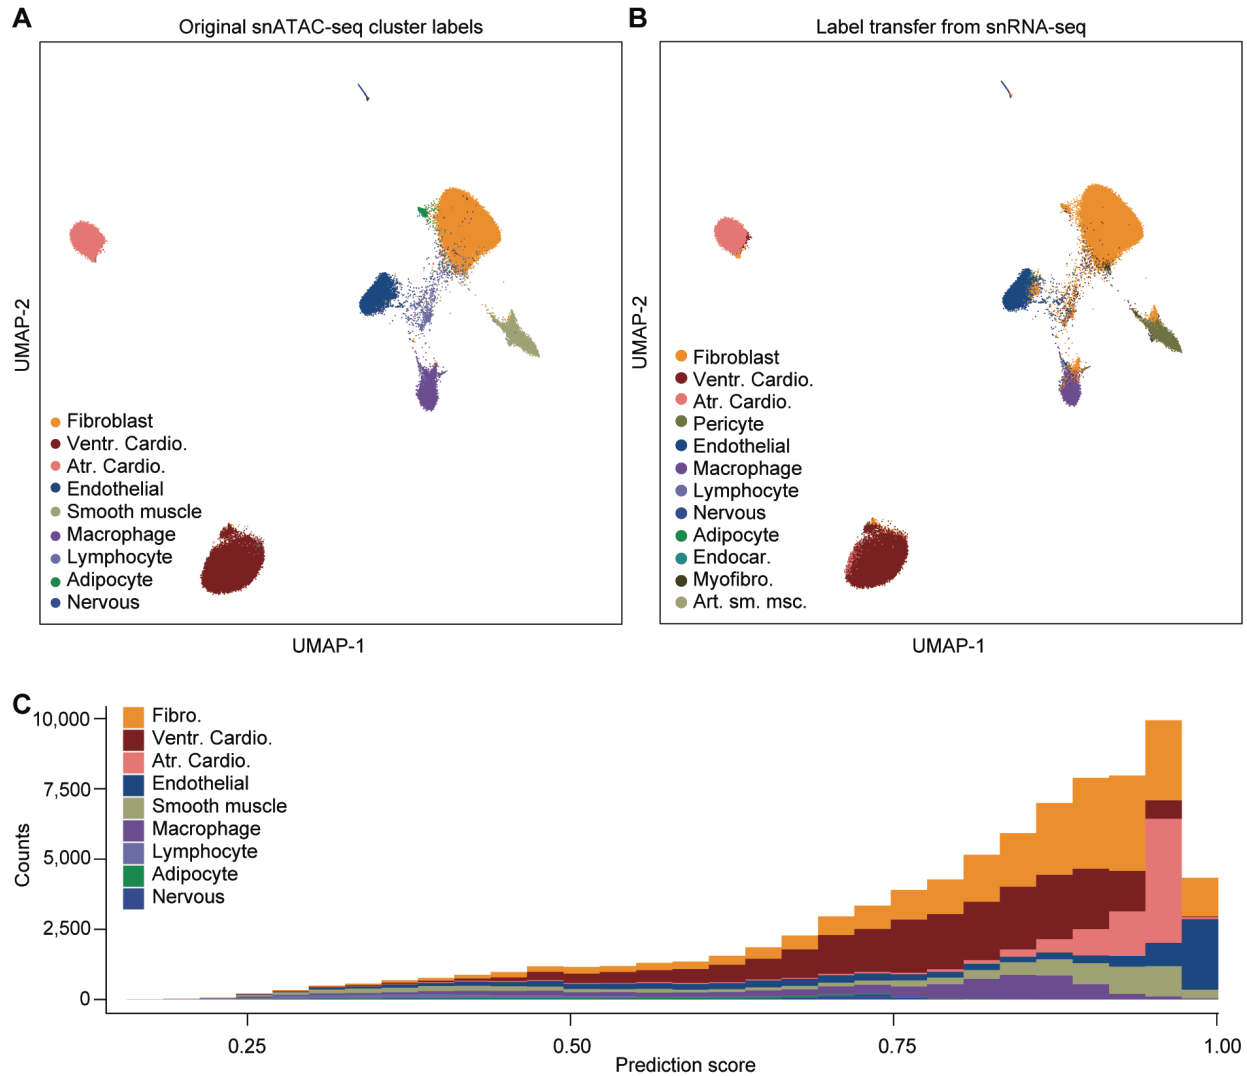

572

573

574 **Supplemental Figure III: Integration of snRNA-seq and snATAC-seq datasets. A, B)**

575 Seurat<sup>23</sup> was used to perform integration of chromatin accessibility and transcriptomes at

576 the single cell level. **A)** UMAP<sup>59</sup> showing nuclei colored based on original snATAC-seq

577 cluster annotation (same as in Figure 1B). **B)** UMAP<sup>59</sup> showing nuclei colored with cluster

578 labels transferred from snRNA-seq. **C)** Histogram showing the prediction score

579 distribution by original snATAC-seq cluster annotation. 93% of nuclei showed a prediction

580 score >0.5 indicating a match between chromatin accessibility and transcriptome.

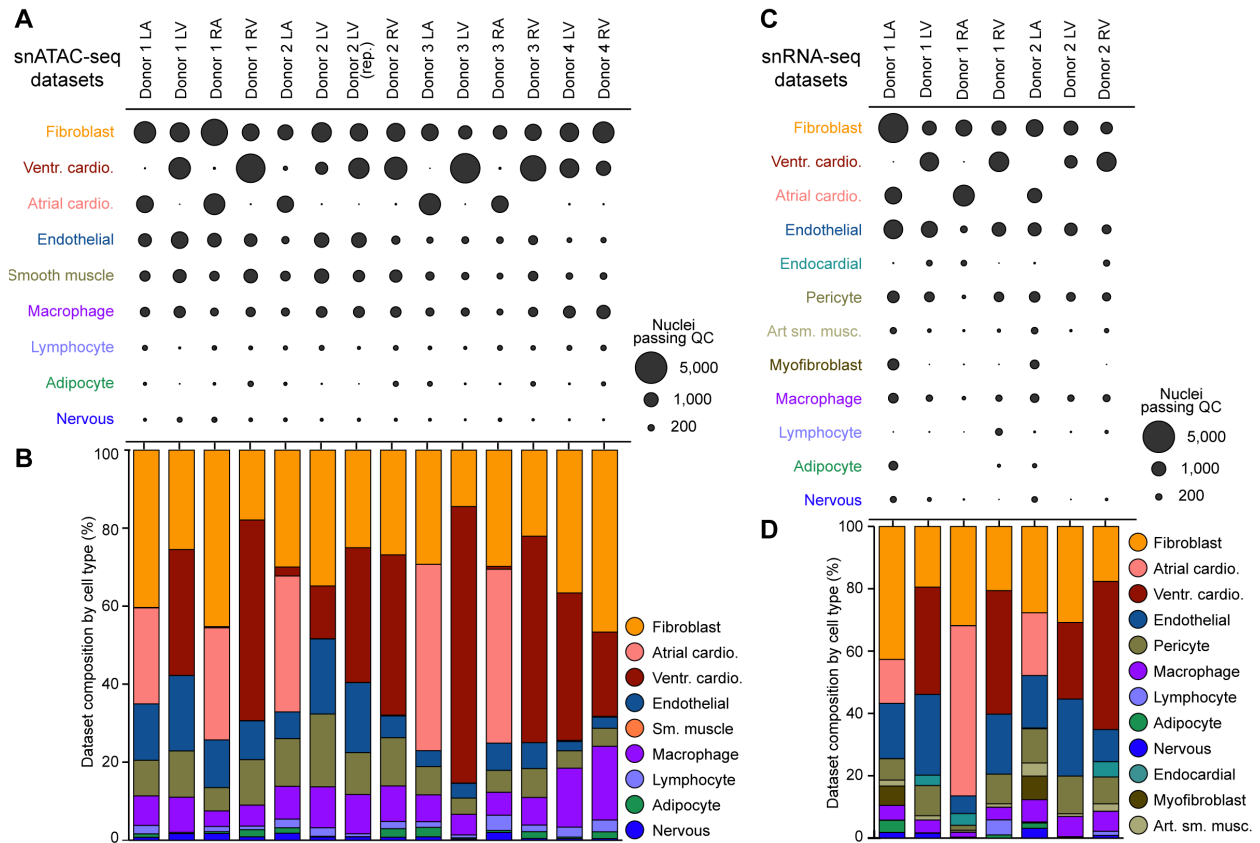

581

582

583 **Supplemental Figure IV: Cellular composition of snATAC-seq and snRNA-seq**

584 **datasets. A)** Dot plot showing number of nuclei passing quality control per cluster for

585 each snATAC-seq dataset. **B)** Bar plot showing cell type composition of each snATAC-

586 seq dataset as percentage of cell types. **C)** Dot plot showing number of nuclei passing

587 quality control per cluster for each snRNA-seq dataset. **D)** Bar plot showing cell type

588 composition of each snRNA-seq dataset as percentage of cell types.

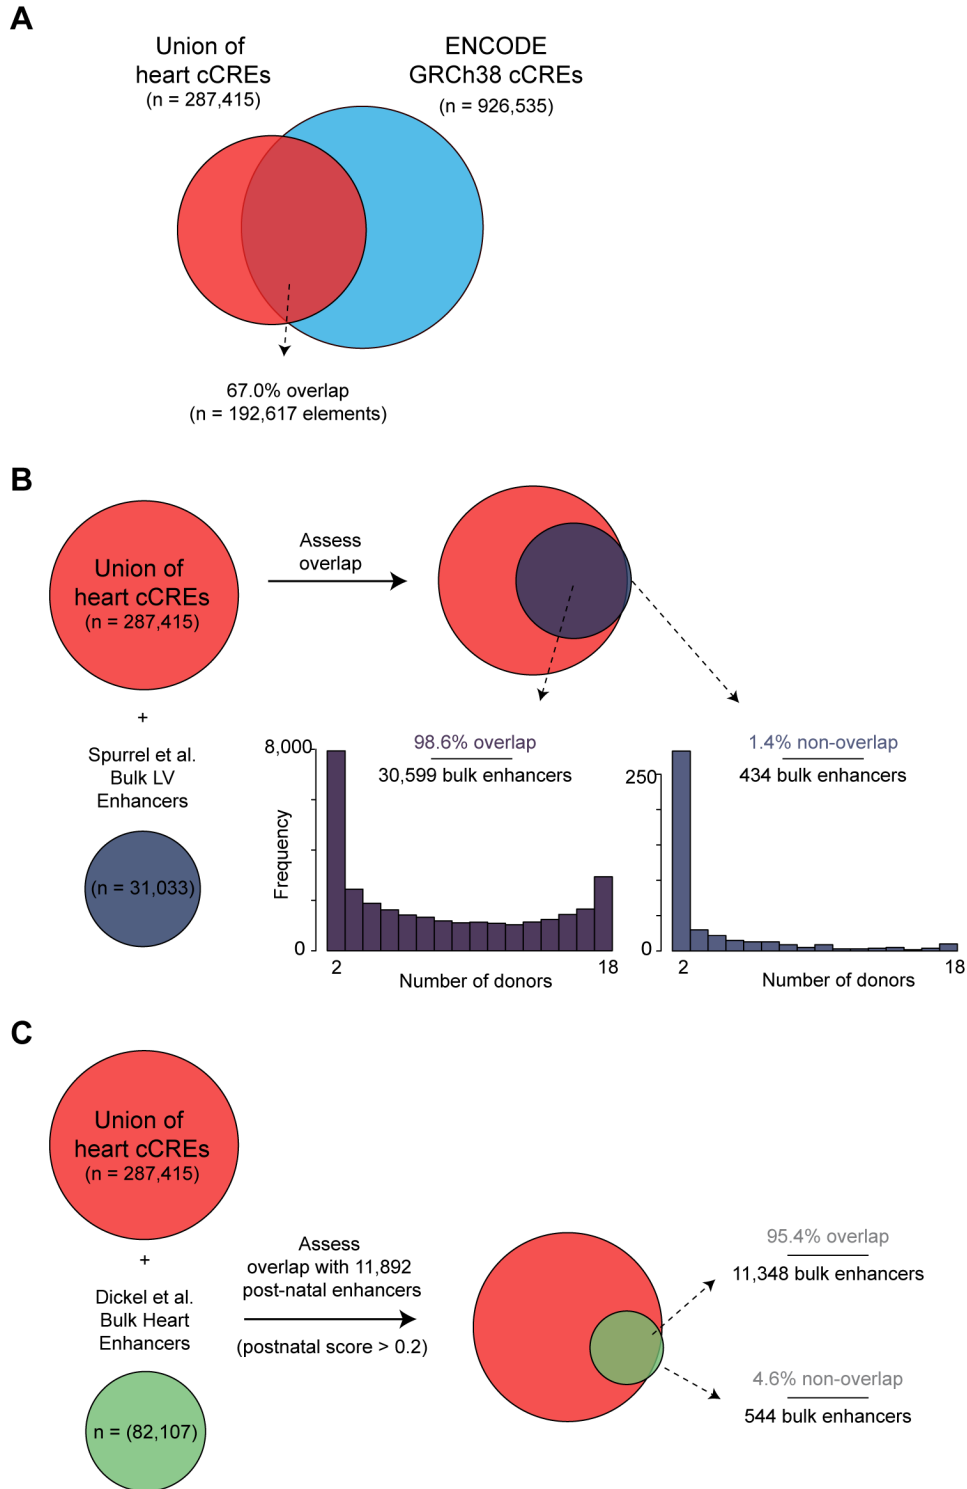

589

590

591 **Supplemental Figure V: Overlap of union of heart candidate *cis* regulatory elements**

592 **(cCREs) with several reference datasets. A) Overlap of the union of 287,415 heart**

593 **cCREs from snATAC-seq with annotated cCREs in the human genome from the**

594 SCREEN database<sup>26,27</sup>. **B)** Overlap of union with healthy left ventricular candidate  
595 enhancers from 18 human donors<sup>14</sup>. Arrows pointing from Venn diagram indicate number  
596 of overlapping (by at least one base pair) and non-overlapping genomic regions.  
597 Histograms display the number of donors harboring reported healthy heart enhancers  
598 (out of 18) for candidate enhancers that overlap union cCREs (left) and candidate  
599 enhancers that do not overlap union cCREs (right). **C)** Overlap of heart cCREs with post-  
600 natal heart candidate enhancers (reported post-natal score > 0.2) from a meta-analysis  
601 of epigenomic data from human and mouse heart tissues<sup>12</sup>. Venn diagrams are not to  
602 scale.

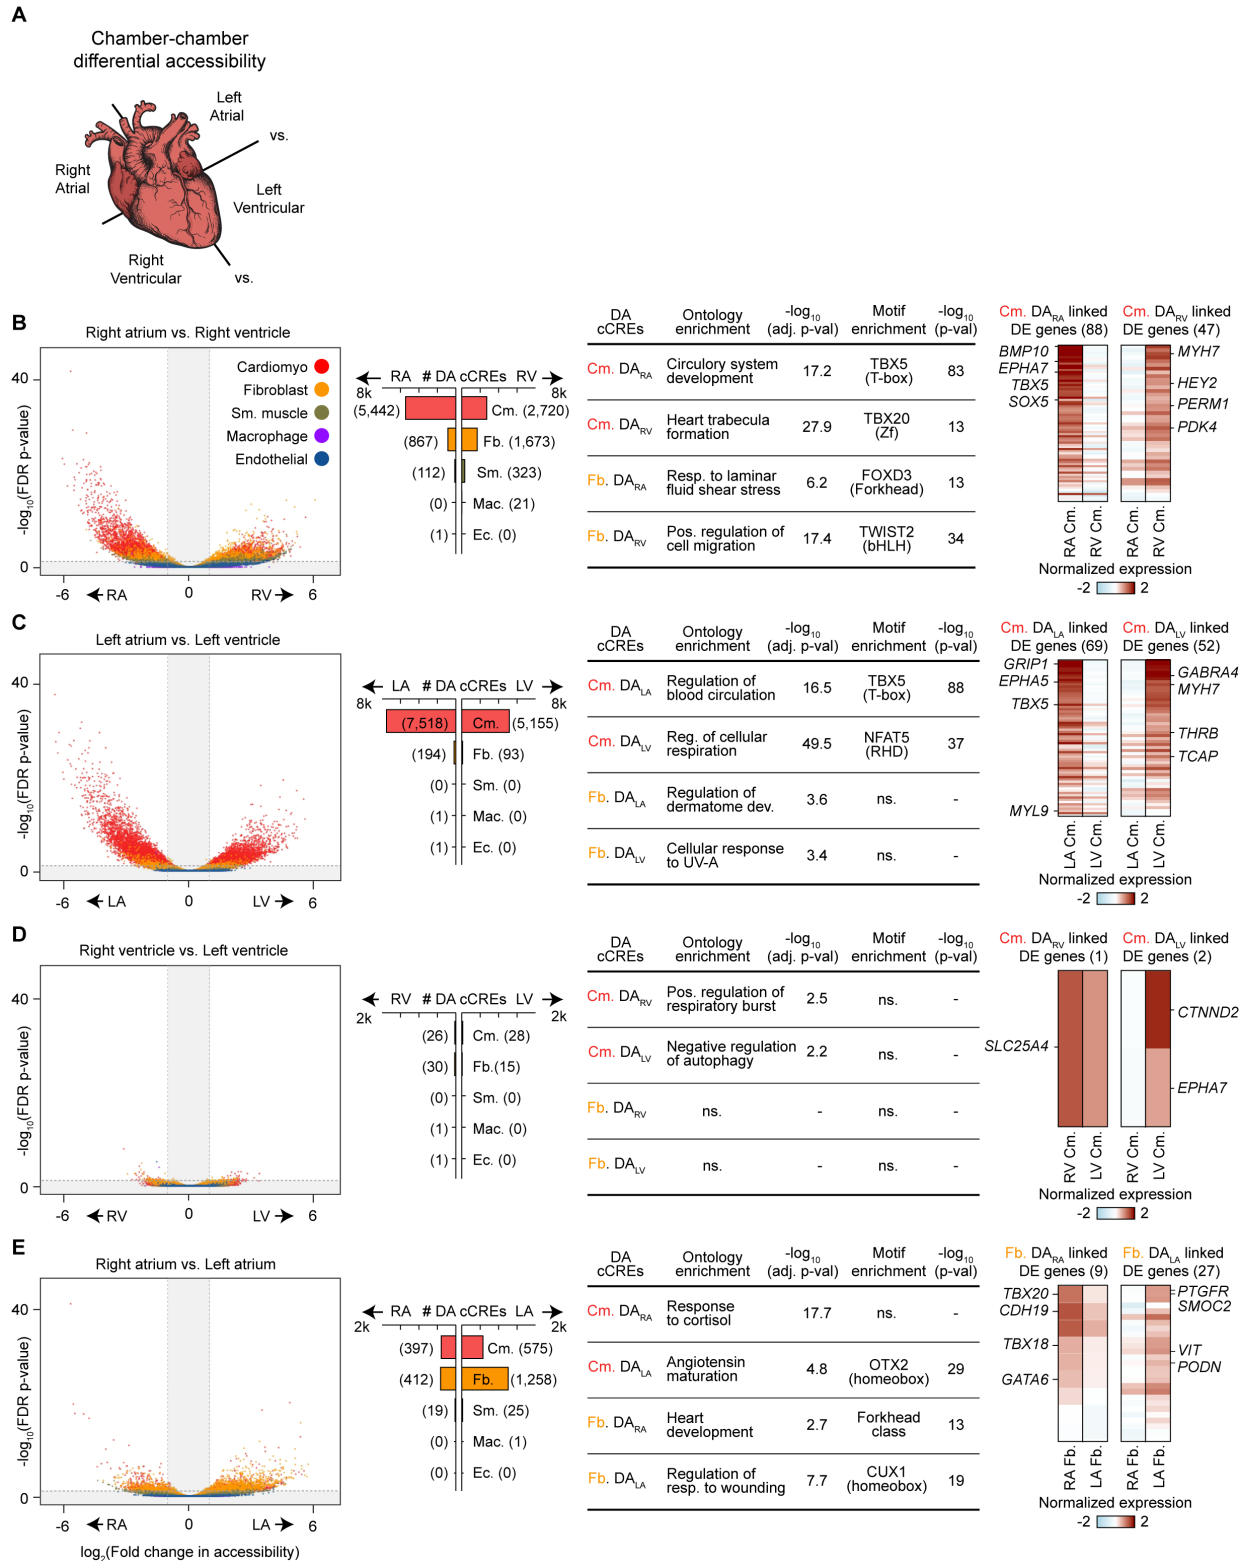

603

604 **Supplemental Figure VI: cCREs in cardiomyocytes and cardiac fibroblasts display**

605 **chamber-dependent differences in accessibility. A) Scheme for comparison of major**



606 cell types across individual heart chambers to identify differential accessible (DA) cCREs.  
607 **(B-E)** Comparisons were performed between **(B)** right atrium (RA) and right ventricle  
608 (RV), **(C)** left atrium (LA) and left ventricle (LV), **(D)** right ventricle (RV) and left ventricle  
609 (LV) and **(E)** right atrium (RA) and left atrium (LA). For each comparison the following  
610 data are displayed. Left: Volcano plots showing identification of differentially accessible  
611 (DA) cCREs in each cell type between indicated chambers. cCREs with  $\log_2(\text{fold change})$   
612  $> 1$  and  $\text{FDR} < 0.05$  after Benjamini-Hochberg correction (outside the shaded area) were  
613 considered DA. Each dot represents a cCRE and the color indicates the cell type. Second  
614 from the left: Bar plots showing number of DA cCREs per cell type. Number of DA cCREs  
615 listed in brackets. Second from the right: GREAT ontology analysis<sup>28</sup> and transcription  
616 factor motif enrichment analysis result<sup>30</sup> for the indicated DA cCREs. The best matches  
617 for selected *de novo* motifs (score  $> 0.7$ ) are displayed. Statistical test for motif  
618 enrichment: hypergeometric test. P-values were not corrected for multiple testing.  
619 Ontology p-values were adjusted using Bonferroni correction. Right: Heatmaps showing  
620 normalized gene expression levels of differentially expressed genes linked to distal DA  
621 cCREs. Displayed are expression levels for putative target genes of distal DA cCREs for  
622 the cell type with most DA cCREs for the indicated chamber comparisons. Number of  
623 genes is shown in brackets. For lists of differentially expressed genes linked to distal DA  
624 cCREs for all comparisons in cardiomyocytes and fibroblasts see Supplemental Table XII  
625 (Cm. = cardiomyocyte, Fb. = fibroblast, ns. = no significant enrichment).

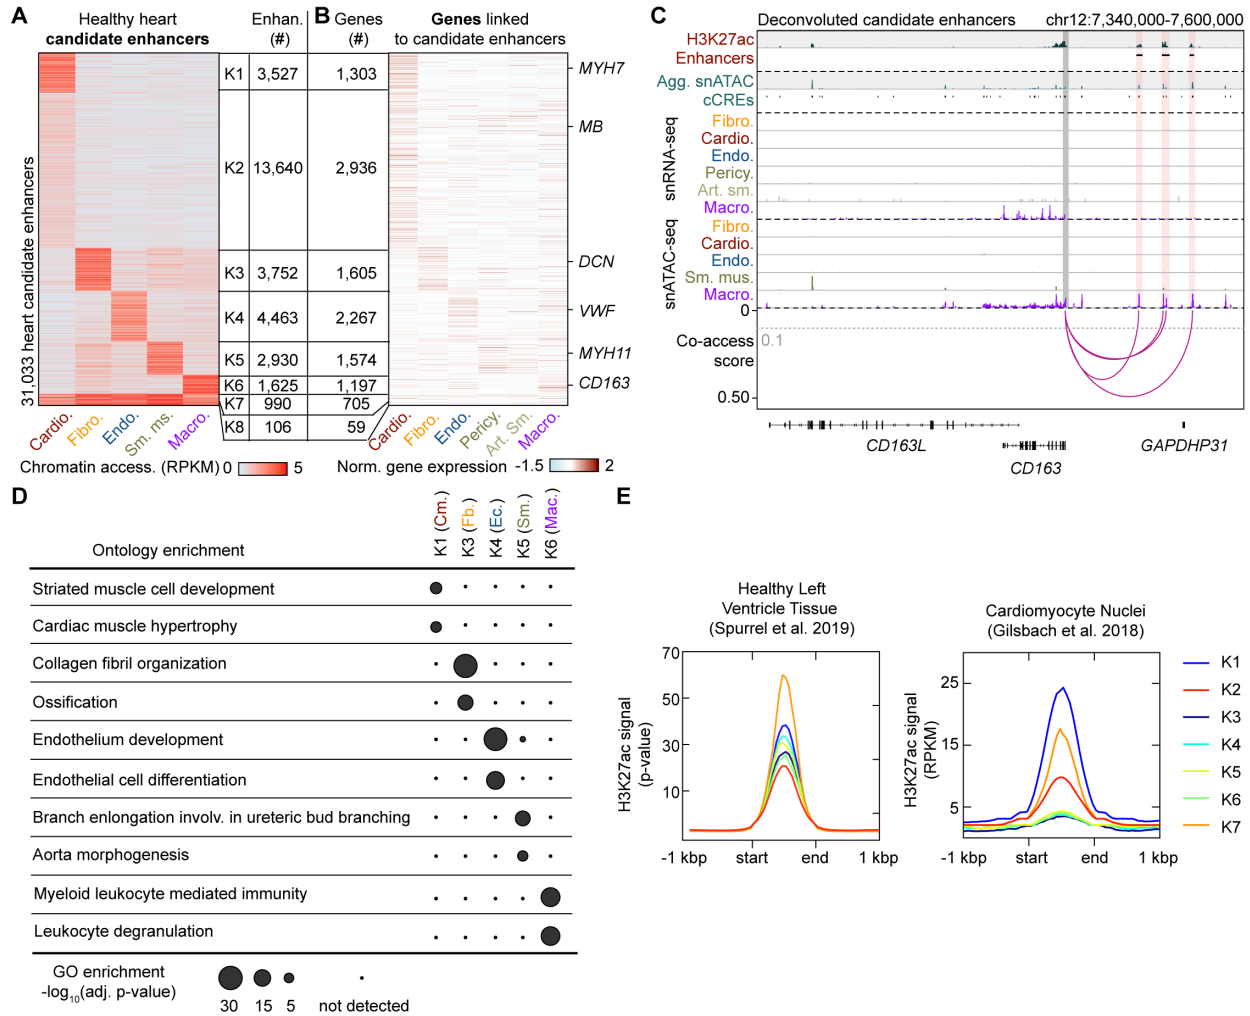

626

627

628 **Supplemental Figure VII: Deconvolution of candidate heart enhancers identified**

629 **from bulk assays. A)** H3K27ac peaks from bulk healthy heart tissue samples<sup>14</sup> were

630 deconvoluted into major cardiac cell types using cell type-resolved chromatin accessibility

631 data. Heatmap displays cell type-resolved chromatin accessibility RPKM (reads per

632 kilobase per million mapped reads) values from left ventricular snATAC-seq datasets.

633 Candidate enhancers were grouped based on chromatin accessibility pattern across cell

634 clusters using K-means. **B)** Heatmap displays cell-type resolved gene expression of

635 putative enhancer target genes from left ventricular snRNA-seq datasets. **C)** Genome

636 browser tracks<sup>60</sup> of H3K27ac in left ventricle tissue and cell type-resolved gene

637 expression (snRNA-seq) and chromatin accessibility (snATAC-seq) for several candidate

638 heart enhancers (indicated by shaded red boxes) attributed to macrophages (K6 in panel

639 **A**). The co-accessibility track shows linkages between the deconvoluted candidate  
640 enhancers and the promoter of *CD163* (cutoff > 0.1, grey dotted line). **D** GREAT  
641 analysis<sup>28</sup> of deconvoluted candidate enhancers. Gene ontology enrichments are shown  
642 as Bonferroni-adjusted p-values. **E** Pileup tracks showing H3K27ac signal in bulk left  
643 ventricle datasets<sup>14</sup> (left) and from purified cardiomyocyte nuclei<sup>15</sup> (right) from non-failing  
644 (NF) hearts in distinct groups of enhancers which were either associated with a cell type  
645 (K1-6 in panel **A**) or broadly accessible across cell types (K7 in panel **A**). H3K27ac signal  
646 in cardiomyocyte nuclei data was highest in the cardiomyocyte-attributed candidate  
647 enhancers as well as the widely accessible candidate enhancers (K1,2,7), whereas signal  
648 strength in left ventricular tissue was highest in widely accessible enhancers and  
649 comparable between groups of cell type-specific candidate enhancers.

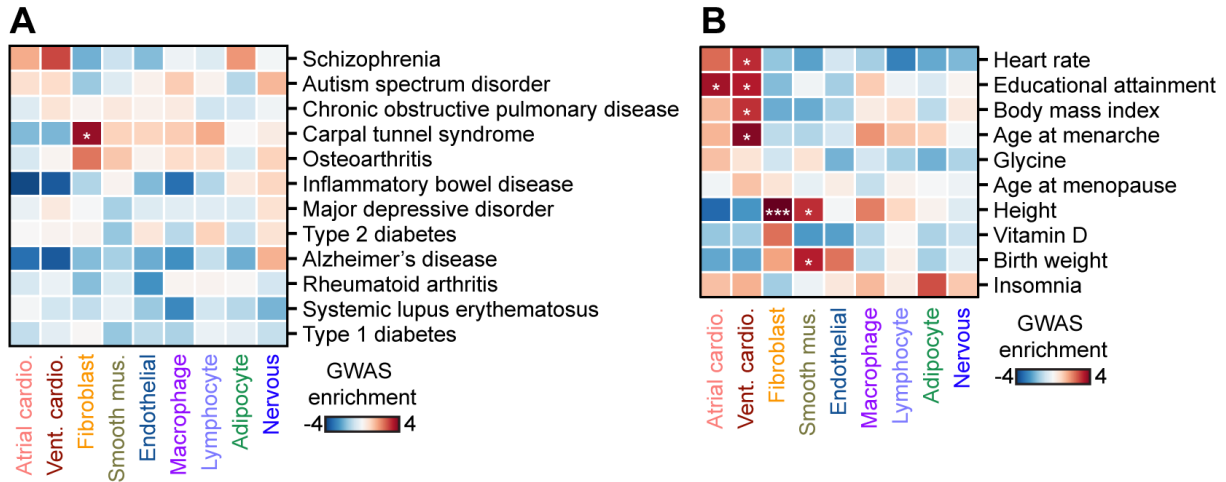

650

651

652 **Supplemental Figure VIII: Risk variant enrichment analysis for non-cardiovascular**

653 **diseases and non-disease traits. A, B)** Enrichment of risk variants associated with (A)

654 non-cardiovascular diseases and (B) non-disease traits from GWAS in cardiac cell type-

655 resolved cCREs. Displayed are z-scores, and these scores were also used to compute

656 one-sided p-values for enrichment that were corrected using the Benjamini Hochberg

657 procedure for multiple testing (\* = FDR < 0.05, \*\*\* = FDR < 0.001).

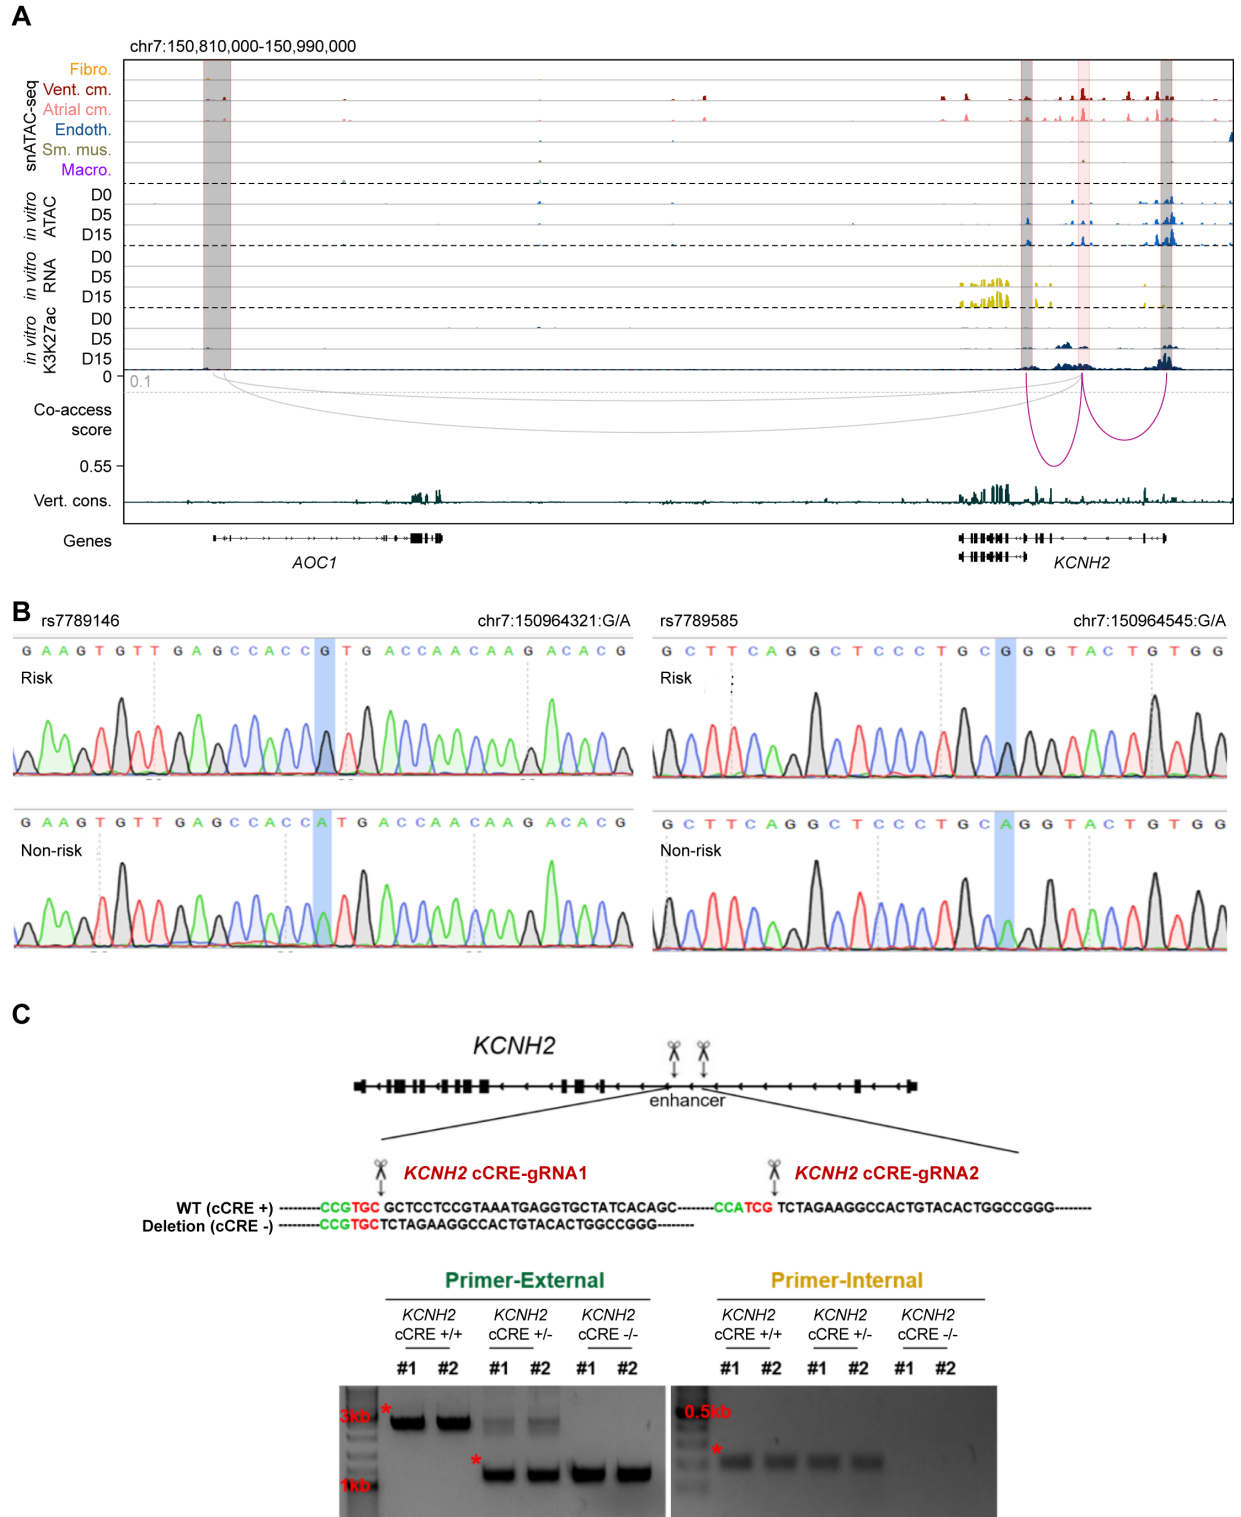

658

659

660 **Supplemental Figure IX: Validation of *KCNH2*-associated candidate enhancer. A)**

661 Genome browser tracks<sup>60</sup> displaying cell type-resolved chromatin accessibility and co-

662 accessibility from snATAC-seq as well as chromatin accessibility, H3K27ac signal, and  
663 gene expression during hPSC-cardiomyocyte differentiation. For illustration purposes, the  
664 co-accessibility track shows linkages between the AF variant-containing cCRE and  
665 annotated gene promoters (co-accessibility > 0.1, grey dotted line). The grey arc  
666 represents links to the promoter of *AOC1* which was not expressed. Figure 5C shows a  
667 zoom into this locus. **B)** Representative Sanger sequencing peak map at *KCNH2* intronic  
668 cCRE showing the risk allele for AF (top row, homozygous rs7789146-G / rs7789585-G)  
669 and the non-risk allele for AF (bottom row, homozygous rs7789146-A / rs7789585-A)  
670 used for luciferase assay. Blue highlighted regions indicate positions of variants. **C)**  
671 Schematic representation of the strategy for deletion of the *KCNH2* enhancer. The paired  
672 gRNAs (gRNA-1 and gRNA-2) were designed to target upstream and downstream of the  
673 *KCNH2* enhancer. Bottom panels show genomic DNA PCR verification of deletion in the  
674 H9-hTnnTZ-pGZ-D2 cell line. The red asterisk indicates specific bands.

675 **SUPPLEMENTAL TABLES**

676 **Supplemental Table I.** Clinical metadata for heart samples.

677 **Supplemental Table II.** Quality control and cell type composition data for each snATAC  
678 dataset.

679 **Supplemental Table III.** Quality control, cell type composition, and integration with  
680 snATAC-seq results for snRNA-seq datasets.

681 **Supplemental Table IV.** snRNA-seq gene expression by major cluster and major cluster-  
682 specific genes. Included are genes that are expressed at higher (positive fold change)  
683 and lower levels (negative fold change) in a given cluster relative to the other clusters.

684 **Supplemental Table V.** Union of 287,415 cCREs in the cell types of the human heart.

685 **Supplemental Table VI.** List of 19,447 cell type-specific cCREs.

686 **Supplemental Table VII.** GREAT<sup>28</sup> analysis for cell type-specific cCREs. Listed are  
687 biological processes with Bonferroni corrected p value <0.05.

688 **Supplemental Table VIII.** ChromVAR<sup>29</sup> motif enrichment results in snATAC-seq cell  
689 clusters.

690 **Supplemental Table IX.** HOMER<sup>30</sup> motif enrichment results for cell type-specific cCREs.  
691 Both *de novo* (p value < 10<sup>-11</sup>) and known motif (q value < 0.05) enrichments are reported.

692 **Supplemental Table X.** Differentially accessible cCREs between heart chambers.

693 **Supplemental Table XI.** Co-accessible cCRE pairs (score > 0.1) from Cicero<sup>33</sup>.

694 **Supplemental Table XII.** Lists of differentially accessible (DA) cCREs linked to  
695 differentially expressed genes.

696 **Supplemental Table XIII.** GREAT<sup>28</sup> analysis for differentially accessible (DA) cCREs  
697 between heart chambers in cardiomyocytes and fibroblasts. Listed are biological  
698 processes with Bonferroni corrected p value < 0.05.

699 **Supplemental Table XIV.** HOMER<sup>30</sup> motif enrichments for differentially accessible (DA)  
700 cCREs between heart chambers in cardiomyocytes and fibroblasts. Both *de novo* (p value  
701 < 10<sup>-11</sup>) and known motif (q value < 0.05) enrichments are reported. CM: cardiomyocytes,  
702 FB: fibroblasts, LV: left ventricle, RV: right ventricle, LA: left atrium, RA: right atrium. For  
703 example, RA-vs-RV\_CM-RV-DA\_denovo denotes *de novo* motif enrichment in  
704 cardiomyocytes (CM) with higher accessibility (DA) in the right ventricle (RV) as  
705 compared to the right atrium (RA).

706 **Supplemental Table XV.** RPKM values and cluster membership for deconvoluted  
707 healthy and disease-associated candidate heart enhancers.

708 **Supplemental Table XVI.** GREAT<sup>28</sup> analysis for distinct groups of deconvoluted  
709 candidate heart enhancers. Listed are biological processes with Bonferroni corrected p  
710 value < 0.05.

711 **Supplemental Table XVII.** HOMER<sup>30</sup> motif enrichment results for distinct groups of  
712 deconvoluted candidate heart enhancers. Both *de novo* (p value < 10<sup>-11</sup>) and known motif  
713 (q value < 0.05) enrichments are reported.

714 **Supplemental Table XVIII.** Studies for non-cardiovascular disease and non-disease trait  
715 GWAS used for LD score regression.

716 **Supplemental Table XIX.** 38 fine mapped risk variants associated with atrial fibrillation  
717 within cardiomyocyte cCREs.

718 **Supplemental Table XX.** Primer sequences with indexes for snATAC-seq libraries.

719 **Supplemental Table XXI.** Primer sets used in qPCR assays.



## 720 **ONLINE METHODS**

721

### 722 **Human Tissues**

723 Adult human heart tissues were procured at the time of organ donation using an  
724 Institutional Review Board protocol (No. 101021) approved by the University of California,  
725 San Diego. Donated hearts were perfused with cold cardioplegia prior to cardiectomy and  
726 then explanted immediately into an ice-cold physiologic solution as we previously  
727 described<sup>63</sup>. Full-thickness samples from each chamber were obtained and epicardial fat  
728 rapidly removed before immediately flash freezing samples in liquid nitrogen. Samples  
729 were received from the United Network for Organ Sharing. Limited clinical data was  
730 obtained for each heart per approved Institutional Review Board protocol (Supplemental  
731 Table I). All samples were stored at -80°C until processing.

732

### 733 **Single nucleus ATAC-seq**

734 Combinatorial barcoding single nucleus ATAC-seq was performed as described  
735 previously<sup>17,18,22</sup> with slight modifications and using new sets of oligos for tagmentation  
736 and PCR (Supplemental Table XX). Nuclei were isolated in gentleMACS M-tubes  
737 (Miltenyi) on a gentleMACS Octo Dissociator (Miltenyi) using the “Protein\_01\_01”  
738 protocol in MACS buffer (5 mM CaCl<sub>2</sub>, 2 mM EDTA, 1X protease inhibitor (Roche, 05-  
739 892-970-001), 300 mM MgAc, 10 mM Tris-HCL pH 8, 0.6 mM DTT). Nuclei were pelleted  
740 with a swinging bucket centrifuge (500 x g, 5 min, 4°C; 5920R, Eppendorf) and  
741 resuspended in 1 mL Nuclear Permeabilization Buffer (1X PBS, 5% Bovine Serum  
742 Albumin, 0.2% IGEPAL CA-630 (Sigma), 1 mM DTT, 1X Protease inhibitor). Nuclei were  
743 rotated at 4 °C for 5 minutes before being pelleted again with a swinging bucket centrifuge  
744 (500 x g, 5 min, 4°C; 5920R, Eppendorf). After centrifugation, permeabilized nuclei were  
745 resuspended in 500 µL high salt tagmentation buffer (36.3 mM Tris-acetate (pH = 7.8),  
746 72.6 mM potassium-acetate, 11 mM Mg-acetate, 17.6% DMF) and counted using a  
747 hemocytometer. Concentration was adjusted to 2,000 nuclei/9 µl, and 2,000 nuclei were  
748 dispensed into each well of a 96-well plate per sample (96 tagmentation wells/sample,  
749 samples were processed in batches of 2-4 samples). For tagmentation, 1 µL barcoded  
750 Tn5 transposomes (Supplemental Table XX) were added using a BenchSmart™ 96

751 (Mettler Toledo), mixed five times, and incubated for 60 min at 37 °C with shaking (500  
752 rpm). To inhibit the Tn5 reaction, 10 µL of 40 mM EDTA (final 20mM) were added to each  
753 well with a BenchSmart™ 96 (Mettler Toledo) and the plate was incubated at 37 °C for  
754 15 min with shaking (500 rpm). Next, 20 µL of 2x sort buffer (2 % BSA, 2 mM EDTA in  
755 PBS) were added using a BenchSmart™ 96 (Mettler Toledo). All wells were combined  
756 into a separate FACS tube for each sample, and stained with Draq7 at 1:150 dilution (Cell  
757 Signaling). Using a SH800 (Sony), 20 nuclei per sample were sorted per well into eight  
758 96-well plates (total of 768 wells) containing 10.5 µL EB (25 pmol primer i7, 25 pmol  
759 primer i5, 200 ng BSA (Sigma)). During the sort, nuclei with 2-8 copies of DNA (2-8n)  
760 were included since cardiomyocyte nuclei in human hearts are often polyploid<sup>15</sup>.  
761 Preparation of sort plates and all downstream pipetting steps were performed on a  
762 Biomek i7 Automated Workstation (Beckman Coulter). After addition of 1 µL 0.2% SDS,  
763 samples were incubated at 55 °C for 7 min with shaking (500 rpm). 1 µL 12.5% Triton-X  
764 was added to each well to quench the SDS. Next, 12.5 µL NEBNext High-Fidelity 2× PCR  
765 Master Mix (NEB) were added and samples were PCR-amplified (72 °C 5 min, 98 °C 30  
766 s, (98 °C 10 s, 63 °C 30 s, 72°C 60 s) × 12 cycles, held at 12 °C). After PCR, all wells  
767 were combined. Libraries were purified according to the MinElute PCR Purification Kit  
768 manual (Qiagen) using a vacuum manifold (QIAvac 24 plus, Qiagen) and size selection  
769 was performed with SPRISelect reagent (Beckmann Coulter, 0.55x and 1.5x). Libraries  
770 were purified one more time with SPRISelect reagent (Beckman Coulter, 1.5x). Libraries  
771 were quantified using a Qubit fluorimeter (Life technologies) and a nucleosomal pattern  
772 of fragment size distribution was verified using a Tapestation (High Sensitivity D1000,  
773 Agilent). Libraries were sequenced on a NextSeq500 sequencer (Illumina) using custom  
774 sequencing primers with following read lengths: 50 + 10 + 12 + 50 (Read1 + Index1 +  
775 Index2 + Read2). Primer and index sequences are listed in Supplemental Table XX.

776

### 777 **Single nucleus RNA-seq**

778 Nuclei were isolated from heart tissue using a gentleMACS (Miltenyi) dissociator. ~40 mg  
779 of frozen heart tissue was suspended in 2 ml of MACS dissociation buffer (5 mM CaCl<sub>2</sub>  
780 (G-Biosciences, R040), 2 mM EDTA (Invitrogen, 15575-038), 1X protease inhibitor  
781 (Roche, 05-892-970-001), 3 mM MgAc (Grow Cells, MRGF-B40), 10 mM Tris-HCl pH 8

782 (Invitrogen, 15568-075), 0.6 mM DTT (Sigma-Aldrich, D9779), and 0.2 U/ $\mu$ L of RNase  
783 inhibitor (Promega, N251B) in water (Corning, 46-000-CV)) and placed on wet ice. Next,  
784 samples were homogenized using gentleMACS dissociator (Miltenyi) with gentleMACS  
785 M tubes (Miltenyi, 130-096-335)) and the “Protein\_01\_01” protocol. Suspension was  
786 filtered through a 30  $\mu$ M CellTrics filter (Sysmex, 04-0042-2316). M tube and filter were  
787 washed with 3 mL of MACS dissociation buffer and combined with the suspension.  
788 Suspension was centrifuged in a swinging bucket centrifuge (Eppendorf, 5920R) at 500  
789 g for 5 minutes (4°C, ramp speed 3/3). Supernatant was carefully removed and pellet was  
790 resuspended in 500  $\mu$ L of nuclei permeabilization buffer (0.1% Triton X-100 (Sigma-  
791 Aldrich, T8787), 1X protease inhibitor (Roche, 05-892-970-001), 1 mM DTT (Sigma-  
792 Aldrich, D9779), 0.2 U/ $\mu$ L RNase inhibitor (Promega, N251B), and 2% BSA (Sigma-  
793 Aldrich, SRE0036) in PBS). Sample was incubated on a rotator for 5 minutes at 4°C and  
794 then centrifuged at 500 g for 5 minutes (Eppendorf, 5920R; 4°C, ramp speed 3/3).  
795 Supernatant was removed and pellet was resuspended in 600-1000  $\mu$ L of sort buffer (1  
796 mM EDTA and 0.2 U/ $\mu$ L RNase inhibitor in 2% BSA (Sigma-Aldrich, SRE0036) in PBS)  
797 and stained with DRAQ7 (1:100, Cell Signaling, 7406). 75,000 nuclei were sorted using  
798 a SH800 sorter (Sony) into 50  $\mu$ L of collection buffer (1 U/  $\mu$ L RNase inhibitor, 5% BSA  
799 (Sigma-Aldrich, SRE0036) in PBS); Sorted nuclei were then centrifuged at 1000 g for 15  
800 minutes (Eppendorf, 5920R; 4°C, ramp speed 3/3) and supernatant was removed. Nuclei  
801 were resuspended in 18-25  $\mu$ L of reaction buffer (0.2 U/ $\mu$ L RNase inhibitor, 1% BSA  
802 (Sigma-Aldrich, SRE0036) in PBS) and counted using a hemocytometer. 12,000 nuclei  
803 were loaded onto a Chromium controller (10x Genomics). Libraries were generated using  
804 the Chromium Single Cell 3’ Library Construction Kit v3 (10x Genomics, 1000078)  
805 according to manufacturer specifications. cDNA was amplified for 12 PCR cycles.  
806 SPRISelect reagent (Beckman Coulter) was used for size selection and clean-up steps.  
807 Final library concentration was assessed by Qubit dsDNA HS Assay Kit (Thermo-Fischer  
808 Scientific) and fragment size was checked using TapeStation High Sensitivity D1000  
809 (Agilent) to ensure that fragment sizes were distributed normally around 500 bp. Libraries  
810 were sequenced using a NextSeq500 or HiSeq4000 (Illumina) using these read lengths:  
811 Read 1: 28 cycles, Read 2: 91 cycles, Index 1: 8 cycles.

812

### 813 **Human pluripotent stem cell culture**

814 An engineered H9-hTnnTZ-pGZ-D2 human pluripotent stem cell transgenic reporter line  
815 was purchased from WiCell and maintained on Geltrex (Gibco) pre-coated tissue culture  
816 plates in E8 medium<sup>64</sup> containing DMEM/F12, L-ascorbic acid-2-phosphate magnesium  
817 (64 mg/L), sodium selenium (14 µg/L), FGF2 (100 µg/L), insulin (19.4 mg/L), NaHCO<sub>3</sub>  
818 (543 mg/L) transferrin (10.7 mg/L), and TGFβ<sub>1</sub>(2 µg/L). Cells were passaged every 3 to  
819 5 days upon reaching ~80% confluency. For single cell passaging experiments, cells were  
820 incubated with pre-warmed TrypLE™ Select Enzyme, no phenol red (1 mL per well of a  
821 6-well plate) for 2-3 minutes in a 37°C, 5% CO<sub>2</sub> incubator. Following incubation, cells  
822 were triturated to create a single cell suspension and cultured in E8 Medium supplied with  
823 Rock inhibitor<sup>65</sup> for 18-24 hours post-split, followed by daily feeding with E8 medium.

824

### 825 ***In vitro* cardiomyocyte differentiation**

826 The H9-hTnnTZ-pGZ-D2 cell line was differentiated into beating cardiomyocytes utilizing  
827 a previously reported Wnt-based monolayer differentiation protocol<sup>66</sup>. Briefly, the H9-  
828 hTnnTZ-pGZ-D2 cell line was cultured in E8 medium for 3-10 passages. Prior to  
829 differentiation, human pluripotent stem cells were seeded at a density of 350,000-400,000  
830 cells per well of a 12-well plate and cultured for two days. For direct differentiation, cells  
831 were treated with 10 µM CHIR99021 (Fisher, #442350) in RPMI/B-27 without insulin.  
832 Fresh RPMI/B-27 without insulin media was replaced at post 24hr and cells were then  
833 cultured two days. At day 3, cells were treated with 5 µM IWP2 (TOCRIS, #353310) in  
834 conditional medium and RPMI/B-27 without insulin 1:1 mix medium for another two days.  
835 At day 5, cells were exposed to fresh RPMI/B-27 without insulin media again for two days.  
836 Then, fresh RPMI/B-27 with insulin media was used and replenished every two days.  
837 Contracting cardiomyocytes were usually observed at day 7-8. D25 *in vitro*  
838 cardiomyocytes were purified utilizing PSC-derived cardiomyocyte isolation kit, human  
839 (Miltenyi Biotec, 130-110-188) and used for Real-time quantitative PCR (RT-qPCR).

840

### 841 **Luciferase reporter assay**

842 A genomic region harboring the *KCNH2* intronic enhancer (containing the risk allele:  
843 homozygous rs7789146-G / rs7789585-G) was amplified by nested-PCR using genomic

844 DNA of H9-hTnnTZ-pGZ-D2 transgenic cells as a template and cloned into pGL4.23  
845 [luc2/minP] (Promega, Cat#E8411) luciferase reporter vector. Synthetic DNA containing  
846 the *KCNH2* intronic enhancer with the non-risk allele (homozygous rs7789146-A /  
847 rs7789585-A) was purchased from integrated DNA technologies and cloned into pGL4.23  
848 [luc2/minP] luciferase vector. One day prior to transfection,  $3 \times 10^5$  of D15 *in vitro*  
849 differentiated cardiomyocytes were plated in a Geltrex-coated 24-well plate.  
850 Cardiomyocytes were transfected with 500 ng of pGL4.23 plasmid (either empty, *KCNH2*  
851 enhancer with G/G allele, or A/A allele) and 10 ng TK:Renilla-luc as internal control using  
852 Lipofectamine Stem Transfection Reagent (Invitrogen, #STEM00003). Media was  
853 replaced with fresh media at 24 hrs post-transfection. At 72 hrs post-transfection, media  
854 was removed and the cells were washed with PBS. Luminescence was measured using  
855 a Dual-Luciferase Reporter Assay System (Promega, #E2920) according to the  
856 manufacturer's protocol.

857

### 858 **CRISPR mediated genome editing experiments**

859 To interrogate the functional significance of the atrial fibrillation-associated risk variant-  
860 containing cCRE at the *KCNH2* locus, the cCRE sequence was genetically deleted in H9-  
861 hTnnTZ-pGZ-D2 transgenic hPSCs using an efficient CRISPR/Cas9-mediated knockout  
862 system<sup>49,67</sup>. Two adjacent gRNAs (*KCNH2*-enh gRNA-1,  
863 CTCATTTACGGAGGAGCGCA; *KCNH2*-enh gRNA-2, TACAGTGGCCTTCTAGACGA)  
864 targeting the cCRE were designed using a web-based software tool CRISPOR<sup>68</sup>, based  
865 on targeting region of interest and minimizing potential off-target effects. The identified  
866 gRNAs were then synthesized *in vitro* using the GeneArt Precision gRNA Synthesis kit  
867 (Invitrogen) according to the manufacturer's protocol. One day prior to transfection,  
868  $1.5 \times 10^5$  H9-hTnnTZ-pGZ-D2 hPSCs were seeded in 12-well plates. A pair of RNP  
869 complexes containing 1.2  $\mu$ g of Cas9 protein (NEB) and 400 ng of *in vitro* transcribed  
870 gRNA were then transfected<sup>69,70</sup> using Lipofectamine stem transfection reagent  
871 (Invitrogen). 72 hours after the transfection, cells were diluted and clonally expanded  
872 another 7 days. Colonies were picked and lysates were prepared after the first passage  
873 for genotyping<sup>71</sup> (*KCNH2*-enh extended forward primer,  
874 ACACCTTACTTTGGGTGAGAAG; *KCNH2*-enh extended reverse primer,

875 AGACAGAGCACAGACCTAGAA; KCNH2-enh internal forward primer,  
876 GCTGTGCAGTGTCAGGTTAT; KCNH2-enh internal reverse primer,  
877 TCTCCCTCCTTCTCTCTCATTG). After confirmation of genome-edited clones by  
878 Sanger sequencing, two transfected WT clones, two heterozygote clones, and two  
879 homozygote clones were selected for further functional analysis.

880

### 881 **RT-qPCR**

882 Total RNA was isolated from the cells using TRIzol reagent (Invitrogen). 1 µg of total RNA  
883 was reverse transcribed using the iScript Reverse Transcription Supermix kit (Bio-Rad)  
884 for RT-qPCR. RT-qPCR was performed using PowerUP™ SYBR™ Green Master Mix  
885 (Applied Biosystems) in the CFX Connect Real-Time System (Bio-Rad). The results were  
886 normalized to the *TBP* gene. The primers used for RT-qPCR are listed in Supplemental  
887 Table XXI.

888

### 889 **Electrophysiology of cardiomyocytes**

890 Both WT and *KCNH2* enhancer knockout D15 *in vitro* cardiomyocytes were purified using  
891 the PSC-derived cardiomyocyte isolation kit, human (Miltenyi Biotec, 130-110-188) and  
892 cultured for another 10-20 days in a low density prior to electrophysiological  
893 measurements. The single-pipette, whole-cell patch current-clamp technique was used  
894 for recordings. Action potentials were recorded with a patch clamp amplifier (Axopatch  
895 200B, Axon) and experiments were performed at a temperature of  $35 \pm 0.5$  °C. Current-  
896 clamp command pulses were generated by a digital-to-analog converter (DigiData 1440,  
897 Axon) which was controlled by the pCLAMP software (10.3, Axon). Pipettes (resistance  
898 3-5 MΩ) were pulled using a micropipette puller (Model P-87, Sutter Instrument Co.).  
899 Several minutes after seal formation, the membrane was ruptured by gentle suction to  
900 establish the whole-cell configuration for voltage clamping. Subsequently, the amplifier  
901 was switched to the current-clamp mode. Cells were paced with 1 Hz, injected current  
902 stimuli from 3 to 15 nA for 5 ms duration. Cells were superfused with extracellular solution  
903 containing (in mM): 140 NaCl, 5.4 KCl, 1.8 CaCl<sub>2</sub>, 1.0 MgCl<sub>2</sub>, 5.5 glucose and 5.0 HEPES  
904 (pH 7.4 adjusted with NaOH). Pipette solution contained (in mM): 120 K-gluconate, 10



905 KCl, 5 NaCl, 10 HEPES, 5 Phosphocreatine, 5 ATP-Mg<sub>2</sub> and Amphotericin 0.44 μM (pH  
906 7.2 adjusted with KOH).

907

## 908 **DATA ANALYSIS**

909

### 910 **Demultiplexing of snATAC-seq reads**

911 For each sequenced snATAC-Seq library, we obtained four FASTQ files, two for paired-  
912 end DNA reads as well as the combinatorial indexes for i5 (768 different PCR indices)  
913 and T7 (96 different tagmentation indices; Supplemental Table XX). We selected all reads  
914 with  $\leq 2$  mistakes per individual index (Hamming distance between each pair of indices  
915 is 4) and subsequently integrated the full barcode at the beginning of the read name in  
916 the demultiplexed FASTQ files (<https://gitlab.com/Grouumf/ATACdemultiplex/>).

917

### 918 **Filtering of snATAC-seq profiles by TSS enrichment and unique fragments**

919 TSS (transcriptional start site) positions were obtained from the GENCODE database  
920 v31<sup>61</sup>. Tn5-corrected insertions were aggregated  $\pm 2000$  bp around each TSS genome  
921 wide. Then, this profile was normalized to the mean accessibility  $\pm (1900 \text{ to } 2000)$  bp from  
922 the TSS and smoothed every 11 bp. The maximum value of the smoothed profile was  
923 taken as the TSS enrichment. We selected all nuclei that had at least 1,000 unique  
924 fragments and a TSS enrichment of at least 7 for all data sets.

925

### 926 **Clustering strategy for snATAC-seq datasets**

927 We utilized two rounds of clustering analysis to identify clusters. The first round of  
928 clustering analysis was performed on individual samples. We divided the genome into  
929 5 kbp consecutive bins and then scored each nucleus for any insertions in these bins,  
930 generating a bin-by-cell binary matrix for each sample. We filtered out those bins that are  
931 generally accessible in all nuclei for each sample using z-score threshold 1.65. Based on  
932 the filtered matrix, we then carried out dimensionality reduction followed by graph-based  
933 clustering to identify cell clusters. We called peaks using MACS2<sup>25</sup> for each cluster using  
934 the aggregated profile of accessibility and then merged the peaks from all clusters to  
935 generate a union peak list. Based on the peak list, we generated a cell-by-peak count

936 matrix and used Scrublet<sup>62</sup> to remove potential doublets with default parameters. Doublet  
937 scores returned by Scrublet<sup>62</sup> were then used to fit a two-component Gaussian mixture  
938 model using the *BayesianGaussianMixture* function from the python package *scikit-*  
939 *learn*<sup>72</sup>. Nuclei in the component with the larger mean doublet score were removed from  
940 downstream analysis since they likely reflected doublets.

941 Next, to carry out the second round of clustering analysis, we merged peaks called from  
942 all samples to form a reference peak list. We generated a binary cell-by-peak matrix using  
943 nuclei from all samples and again performed the dimensionality reduction followed by  
944 graph-based clustering to obtain the final cell clusters across the entire dataset.

945

#### 946 **Dimensionality reduction and batch correction of snATAC-seq data**

947 For processing of snATAC-seq data we adapted our previously published method,  
948 SnapATAC<sup>22</sup>. To reduce the dimensionality of the peak by cell count matrix, SnapATAC  
949 utilizes spectral embedding for dimensionality reduction. To further increase the  
950 performance and scalability of spectral embedding, we applied the Nyström method<sup>73</sup> to  
951 enable handling of large datasets. Specifically, we first randomly sampled 35,000 nuclei  
952 as training data. We then computed the Jaccard index between each pair of cells in the  
953 training set and constructed the similarity matrix  $S$ . We computed the matrix  $P = D^{-1}S S$ ,  
954 where  $D$  is the diagonal matrix such that  $D_{ii} = \sum_j S_{ij}$ . The eigendecomposition was  
955 performed on  $P$  and the eigenvector with eigenvalue 1 was discarded. From the rest of  
956 the eigenvectors, we took  $k$  of them corresponding to the largest eigenvalues as the  
957 spectral embedding of the training data. We utilized the Nyström method<sup>73</sup> to extend the  
958 embedding to the data outside the training set. Given a set of unseen samples, we  
959 computed the similarity matrix  $S'$  between the new samples and the training set. The  
960 embedding of the new samples is given by  $' = S'U\Lambda^{-1}$ , where  $U$  and  $\Lambda$  are the  
961 eigenvectors and eigenvalues of  $P$  obtained in the previous step.

962 To correct for donor/batch specific effects, after dimensionality reduction we performed  
963 cell grouping on individual samples using  $k$ -mean clustering with  $k$  equal to  
964 20. We then constructed  $k$ -NN graphs for each sample and used the MNN correction  
965 method to identify mutual nearest neighbors<sup>74</sup>. These mutual nearest neighbors were



966 used as the anchors to match the cells between different samples and correct for  
967 donor/batch effects as described previously<sup>74</sup>.

968

### 969 **Clustering of snATAC-seq data**

970 We constructed the k-nearest neighbor graph (k-NNG) using low-dimensional embedding  
971 of the nuclei with k equal to 50. We then applied the Leiden algorithm<sup>75</sup> with constant  
972 Potts model (CPM) to find communities in the k-NNG corresponding to the cell clusters.

973 The Leiden algorithm can be configured to use different quality functions. The modularity  
974 model is a popular choice but it is hampered by the resolution-limit, particularly when the  
975 network is large<sup>76</sup>. Therefore, we used the modularity model only in the first round of  
976 clustering analysis to identify initial clusters. In the final round of clustering, we chose the  
977 constant Potts model as the quality function since it is resolution-limit-free and is better  
978 suited for identifying rare populations in a large dataset<sup>76</sup>. Nuclei from two small clusters  
979 (280 and 254 nuclei) with low reproducibility and stability were discarded from  
980 downstream analysis. 34 nuclei that formed clusters of 1 and 2 nuclei were discarded as  
981 well.

982

### 983 **Processing and clustering analysis of snRNA-seq datasets**

984 Raw sequencing data was demultiplexed and preprocessed using the Cell Ranger  
985 software package v3.0.2 (10x Genomics). Raw sequencing files were first converted from  
986 Illumina BCL files to FASTQ files using *cellranger mkfastq*. Demultiplexed FASTQs were  
987 aligned to the GRCh38 reference genome (10x Genomics), and reads for exonic and  
988 intronic reads mapping to protein coding genes, long non-coding RNA, antisense RNA,  
989 and pseudogenes were used to generate a counts matrix using *cellranger count*; expect-  
990 cells parameter was set to 5,000. A separate counts matrix for each sample was also  
991 generated using only reads mapped to intronic regions.

992 Next, exon + intron count matrices for individual datasets were processed using the  
993 Seurat v3.1.4 R package<sup>23</sup> (<https://satijalab.org/seurat/>) to assess dataset quality.  
994 Features represented in at least 3 cells and barcodes with between 500 and 4,000 genes  
995 were used for downstream processing; additionally, barcodes with mitochondrial read  
996 percentages greater than 5% were removed. Counts were log-normalized and scaled by

997 a factor of 10,000 using *NormalizeData*. To identify variable genes, *FindVariableFeatures*  
998 was run with default parameters except for `nfeatures = 3000` to return the top 3,000  
999 variable genes. All genes were then scaled using *ScaleData*, which transforms the  
1000 expression values for downstream analysis. Next, principal component analysis was  
1001 performed using *RunPCA* with default parameters and the top 3,000 variable features as  
1002 input. The first 20 principal components were used to run clustering using *FindNeighbors*  
1003 and *FindClusters* (parameter `res = 0.4`). To generate UMAP coordinates *RunUMAP* was  
1004 run using the first 20 principal components and with parameters `umap.method = "umap-learn"`,  
1005 and `metric = "correlation"`. Doublet scores (pANN) were generated for cell  
1006 barcodes using *DoubletFinder*<sup>77</sup> (<https://github.com/chris-mcginnis-ucsf/DoubletFinder>)  
1007 using the parameters `pN = 0.15` and `pK = 0.005`; the anticipated collision rate was set by  
1008 specifying 2% collisions per thousand nuclei for individual datasets.  
1009 Individual datasets were merged together using the *merge* function in Seurat to combine  
1010 the count matrices and designate unique barcodes. Cell barcodes with pANN scores  
1011 greater than 0 were removed from downstream analysis. Metadata was also encoded for  
1012 each barcode, and the merged dataset was processed in a similar manner as described  
1013 above; clusters were identified using *FindNeighbors* and *FindClusters* (`res = 0.8`). To  
1014 generate the UMAP coordinates, the first 14 principal components were used in  
1015 *RunUMAP*; the UMAP algorithm for Seurat v3.1.4 uses the *uwot* R-package, and that  
1016 setting was used to generate the coordinates here. To regress out donor specific effects,  
1017 the Harmony R package (<https://github.com/immunogenomics/harmony>)<sup>78</sup> was used, and  
1018 the recomputed principal components were used to re-cluster the cells and rerun UMAP  
1019 using the above parameters. For downstream analysis and comparison to snATAC-seq  
1020 data we combined ventricular cardiomyocyte clusters, atrial cardiomyocyte clusters,  
1021 fibroblast clusters, and endothelial cell clusters manually based on shared gene  
1022 expression patterns (Fig S2G, H). Cluster-specific genes in the all-transcripts dataset  
1023 were identified in a global differential gene expression test using *FindAllMarkers* with  
1024 parameters `logFC = 0.25`, `min.pct = 0.25`, and `only.pos = FALSE`.

1025

1026 **Integration of snRNA-seq and snATAC-seq data**

1027 The snRNA-seq and snATAC-seq datasets were used to perform label transfer from the  
1028 RNA cells onto the snATAC-seq dataset using the Seurat v3.1.4 R package  
1029 (<https://satijalab.org/seurat/>)<sup>23</sup>. Gene activity scores were calculated using chromatin  
1030 accessibility in regions from the promoter up to 2kb upstream for each ATAC nucleus.  
1031 Activity scores were log-normalized and scaled using *NormalizeData* and *ScaleData*. To  
1032 compare the snRNA and snATAC datasets and identify anchors, *FindTransferAnchors*  
1033 was run considering the top 3,000 variable features from the snRNA-seq dataset. Anchor  
1034 pairs were used to assign RNA-seq labels to the snATAC-seq cells using *TransferData*,  
1035 with the weight.reduction parameter set to the principal components used in snATAC-seq  
1036 clustering. The efficacy of integration was assessed by examining the distribution of the  
1037 maximum prediction scores output by *TransferData* and the distribution of annotated  
1038 snATAC-seq identities to the corresponding predicted label.

1039

#### 1040 **Creation of a consensus list of heart candidate *cis* regulatory elements**

1041 MACS2 (v2.1.2)<sup>25</sup> was used to identify accessible chromatin sites for each cluster with  
1042 the following parameters: `-q 0.01 --nomodel --shift -100 --extsize 200 -g 2789775646 --`  
1043 `call-summits --keepdup-all`. Estimated genome size was determined to be 2789775646  
1044 bp and was indicated by the `-g` parameter. We next filtered out peaks overlapping with  
1045 the ENCODE blacklist<sup>79</sup> (hg38, <https://github.com/Boyle-Lab/Blacklist/>).

1046 To generate the union of heart cCREs, we merged the blacklist-filtered peaks obtained  
1047 for each cluster using the BEDtools merge command with default settings (v2.25.0)<sup>80</sup>.

1048

#### 1049 **Computing relative accessibility scores for candidate *cis* regulatory elements**

1050 To correct biases arising from differential read depth among cells and cell types, we  
1051 derived a procedure that normalizes chromatin accessibility at cCREs identified by  
1052 MACS2 peak calling (v2.1.2)<sup>25</sup>. We define the set of accessible loci by  $L$  and we define a  
1053 peak  $p$  as a subset of related loci  $l$  from  $L$ . Let  $a_l$  be the accessibility of accessible locus  $l$   
1054 and  $P$  the set of non-overlapping peaks used to define the loci. For a given cell type  $S_i \in$   
1055  $S$ , we computed the median  $med_j$  number of reads sequenced per cells. For each feature  
1056  $p_j \in P$ , we computed  $m_{ij}$  the average number of reads sequenced from  $S_i$  and

1057 overlapping  $p_j$ . We then defined the activity  $a_{ij}$  of loci  $p_j$  in  $S_i$  as  $a_{ij} =$   
1058  $10^6 \cdot \frac{1/\text{med}_j \sqrt{(1-m_{ij})}}{\sum_{j \in P} 1/\text{med}_j \sqrt{(1-m_{ij})}}$ . We then define the relative accessibility score (RAS)  $A_{ij} = \frac{a_{ij}}{\sum_{i \in S} a_{ij}}$ .

1059

## 1060 **K-means clustering of candidate *cis* regulatory elements**

1061 We clustered the union of 287,415 candidate *cis* regulatory elements (cCREs) using a K-  
1062 means clustering procedure. We first created a sparse cell x peak matrix that was  
1063 transformed into a RAS-normalized cell type x peak matrix. We then performed K-means  
1064 on the normalized matrix with  $K$  from 2 to 12 and computed the Davies-Bouldin (DB) index  
1065 for each  $K$ <sup>81</sup>. Let  $R_{xy} = \frac{(s_x + s_y)}{d_{xy}}$  with  $s_x$  the average distance of each cell of cluster  $x$  and  
1066  $d_{xy}$  the distance between the centroids of clusters  $x$  and  $y$ . The Davies-Bouldin index is  
1067 defined as  $DB = \frac{1}{K} \sum_{x,y \in K} \max_{x \neq y} (R_{xy})$ . We selected  $K = 9$  since it resulted in the lowest DB  
1068 index which indicates the best partition. We used the python library scikit-learn<sup>72</sup> to  
1069 compute the K-means algorithm and the DB index<sup>81</sup>.

1070

## 1071 **Cell type annotation**

1072 We annotated snATAC-seq and snRNA-seq clusters based on chromatin accessibility at  
1073 promoter regions or expression of known lineage marker genes, respectively. We  
1074 annotated atrial and ventricular cardiomyocytes based on differential chromatin  
1075 accessibility and gene expression at *NPPA*, *MYH6*, *KCNJ3*, *MYL7*, *MYH7*, *HEY2*, *MYL2*  
1076 and other reported markers of atrial and ventricular cardiomyocytes<sup>82-84</sup>. We used, for  
1077 example, the gene *DCN* to annotate cardiac fibroblasts<sup>85</sup>; *VWF* and *EGFL7* for endothelial  
1078 cells<sup>86,87</sup>; *GJA4* and *TAGLN* for smooth muscle cells<sup>88,89</sup>; *CD163* and *MS4A6A* for  
1079 macrophages<sup>90,91</sup>; *IL7R* and *THEMIS* for lymphocytes<sup>92,93</sup>; *ADIPOQ* and *CIDEA* for  
1080 adipocytes<sup>94,95</sup>; *NRXN3* and *GPM6B* for a cluster of nervous cells with neuronal and  
1081 Schwann-like gene expression and chromatin accessibility signatures<sup>9,10,96</sup>. From  
1082 snRNA-seq, we identified a population of endothelial-like cells with specific expression of  
1083 endocardial cell markers *NRG3* and *NPR3*<sup>97,98</sup>. We also identified subtypes of  
1084 mesenchymal cells that included myofibroblasts with characteristic expression of  
1085 embryonic smooth muscle actin *MYH10*<sup>99,100</sup> as well as arterial smooth muscle cells with

1086 preferential expression of *ACTA2* and *TAGLN* relative to a larger cluster of pericytes<sup>101</sup>  
1087 (Supplemental Table IV). snRNA-seq annotations were consistent with recent single cell  
1088 transcriptomic analyses of adult human heart tissue<sup>9,10</sup>.

1089

### 1090 **Identification of cell type-specific candidate *cis* regulatory elements**

1091 We used *edgeR* (version 3.24) in R<sup>102</sup> to identify cell type-specific cCREs. For each cCRE,  
1092 accessibility within a cell type was compared to average accessibility in all other clusters.  
1093 For each cell type, we created a count table for each cCRE using the following strategy:  
1094 each sample was described with a donor and a chamber ID. For each sample ID we  
1095 reported read count within 1) the cell type and 2) the rest of the cell types in aggregate.  
1096 We used this count matrix as input for *edgeR* analysis<sup>102</sup>. We performed a likelihood ratio  
1097 test and considered peaks with FDR < 0.01 after Benjamini-Hochberg correction and  
1098  $\log_2(\text{fold Change}) > 0$  as cell type-specific.

1099

### 1100 **Co-accessibility analysis using Cicero**

1101 We used the R package Cicero<sup>33</sup> to infer co-accessible chromatin loci. For each  
1102 chromosome, we used as input the corresponding peaks from our 287,415 cCRE union  
1103 set and the coordinates of the snATAC-seq UMAP<sup>59</sup>. We randomly subsampled 15,000  
1104 cells from our aggregate snATAC-seq dataset to construct input matrices for Cicero  
1105 analysis. We used +/-250 kbp as cutoff for co-accessibility interactions. All other settings  
1106 were default.

1107

### 1108 **Correlation of gene expression and promoter accessibility**

1109 We defined promoter regions as transcriptional start sites (TSS) +/-2 kbp. Transcriptional  
1110 start sites were extracted from annotation files from GENCODE release 33<sup>61</sup>. We  
1111 identified promoter-overlapping peaks using BEDtools<sup>80</sup> and a custom script (see **Code**  
1112 **availability**). For each overlapping pair (peak, promoter) identified, we kept only the open  
1113 chromatin site closest to the TSS in order to obtain a 1:1 correspondence between genes  
1114 and open chromatin peaks. We then used the relative accessibility score (RAS) and the  
1115 cluster-scaled FPKM gene expression score to create feature x cell type matrices for  
1116 RNA-seq and ATAC-seq datasets. We then used these matrices to create heatmaps and

1117 to perform ATAC-seq/RNA-seq cluster correlation analysis using the Pearson similarity  
1118 metric. For each cell type, we computed the Pearson correlation score between the RAS  
1119 vector of the 7,081 promoters and the scaled FPKM vector of the corresponding 7,081  
1120 genes identified via the 1:1 correspondence method described above.

1121

### 1122 **Differential accessibility between cell types by chamber**

1123 Between-heart chamber differential accessibility analysis was performed for five cell types  
1124 from our aggregated single nuclear ATAC-seq dataset. We considered only cell types  
1125 which had a representation of at least 50 nuclei per dataset and at least 300 nuclei across  
1126 each tested condition. The cell types that met these inclusion criteria included  
1127 cardiomyocytes, fibroblasts, endothelial cells, smooth muscle cells, and macrophages.  
1128 Within each cell type, a generalized linear model framework was employed using the R  
1129 package edgeR<sup>102</sup>. All fragments for a given cell type were aggregated in the .bed format.  
1130 MACS2<sup>25</sup> was used to call peaks on the aggregate .bed file for each cell type with the  
1131 parameters specified above. *NarrowPeak* output bed files were used for differential  
1132 accessibility testing. The aggregate .bed file for each cell type was then partitioned based  
1133 on dataset of origin using nuclear barcodes. The 'coverage' option of the BEDtools  
1134 package<sup>80</sup> was applied with default settings to count the total number of chromatin  
1135 fragments from each dataset overlapping *narrowPeaks* called on the aggregate .bed file  
1136 for the corresponding cell type. This yielded a raw count matrix in the format of single  
1137 nuclear ATAC-seq datasets (columns) by *narrowPeaks* (rows) for each cell type. The raw  
1138 count matrix was used as input for edgeR analysis. To filter low-coverage peaks from our  
1139 analysis, we used the 'filterByExpr' command within edgeR with default settings. We  
1140 applied an average prior count of one during fitting of the generalized linear model in  
1141 order to avoid inflated fold changes in instances for which peaks lacked coverage for one  
1142 but not both tested conditions. We modelled chromatin accessibility at each peak as a  
1143 function of heart chamber (group) with sex as a covariate. The generalized linear model  
1144 was expressed as follows in edgeR notation:

1145 --

```
1146 design <- model.matrix(~sex+group)
```

```
1147 y <- estimateDisp(y, design, prior.count = 1)
```



1148 *glmFit(y, design)*

1149 --

1150 Significance was tested using a likelihood ratio test. To account for testing multiple  
1151 hypotheses, a Benjamini-Hochberg significance correction was applied for all cCREs  
1152 tested within each considered cell type. Any cCRE with an absolute  $\log_2(\text{fold change}) >$   
1153 1 and an FDR-corrected p value  $< 0.05$  was considered significant.

1154

### 1155 **Gene expression analysis of genes co-accessible with DA candidate *cis* regulatory** 1156 **elements**

1157 To compare the expression of genes co-accessible with heart chamber-dependent distal  
1158 DA cCREs (outside +/- 2 kb of TSS) in cardiomyocytes and fibroblasts, we performed  
1159 differential expression testing for all genes between indicated heart chambers using  
1160 Wilcoxon rank sum test in Seurat<sup>23</sup>. Genes with an absolute Fold Change  $> 1.5$  and an  
1161 FDR-adjusted P value  $< 0.05$  were considered differentially expressed. We then tested  
1162 resulting genes for co-accessibility<sup>33</sup> with distal DA cCREs at a co-accessibility score  
1163 threshold of 0.1, and displayed scaled gene expression values from Seurat for the  
1164 indicated differentially expressed genes linked to chamber-dependent distal DA cCREs.

1165

### 1166 **GREAT ontology analysis**

1167 The Genomic Regions Enrichment of Annotations Tool (GREAT,  
1168 <http://great.stanford.edu/public/html/index.php>)<sup>28</sup> was used with default settings for  
1169 indicated cCREs or candidate enhancers in the .bed format. Biological process  
1170 enrichments are reported. P-values shown for enrichment are Bonferroni-corrected  
1171 binomial p-values.

1172

### 1173 **Motif enrichment analysis**

1174 For *de novo* and known motif enrichment analysis of cluster-specific cCREs, the  
1175 *findMotifsGenome.pl* utility of the HOMER package was used with default settings<sup>30</sup>. For  
1176 display of enrichment patterns for motifs from the JASPAR<sup>103</sup> database with evidence of  
1177 enrichment in at least one set of cell type-specific cCREs, motifs with an enrichment p-  
1178 value  $< 10^{-5}$  in at least one set of cluster-specific cCREs were selected. For motif

1179 enrichment within differentially accessible cCREs, *narrowPeak* calls from MACS2 were  
1180 used as input, with peaks called on the corresponding cell type (as described above) used  
1181 as background. For enrichment of motifs within deconvoluted bulk enhancers, snATAC-  
1182 seq peaks from the union of snATAC-seq peaks were utilized. Summits were extracted  
1183 from peaks that overlapped bulk enhancer annotations and extended by 250bp on either  
1184 side to obtain fixed-width peaks. We also computed motif enrichment scores at single-  
1185 cell resolution using chromVAR<sup>29</sup>. For input to chromVAR, we used the summits of the  
1186 287,415 peaks in our consensus list extended by 250 base pairs in either direction, and  
1187 a set of 870 non-redundant motifs as input. To identify differentially enriched motifs in  
1188 each cell type, we used the following strategy: for each cell type and each motif, we  
1189 computed a Rank Sum test between the chromVAR Z-score distributions from cells within  
1190 the cell type and outside of the cell type. Tests were run using a random sampling of  
1191 40,000 cells. Then, for each cell type we used 1e-8 as p-value cutoff. In addition, we  
1192 applied a Bonferroni correction to account for multiple testing which resulted in selection  
1193 of significant motifs with p-value < 1e-11.

1194

### 1195 **Bulk candidate heart enhancer deconvolution**

1196 We obtained published candidate heart enhancers annotated by H3K27ac ChIP-seq from  
1197 a recently reported bulk survey of healthy left ventricular tissue from 18 human donors<sup>14</sup>.  
1198 Candidate enhancers were defined per the study as H3K27ac ChIP-seq peaks that were  
1199 at least 1kb away from a transcription start site and present in two or more donors.  
1200 Because these reference annotations were derived from bulk profiling of healthy left  
1201 ventricles, we selected only left ventricular nuclei from our aggregate dataset for  
1202 comparison. We limited our analysis to cell types that comprised at least 5% of nuclei by  
1203 proportion in our aggregate dataset. These included cardiomyocytes, fibroblasts,  
1204 endothelial cells, smooth muscle cells, and macrophages. We first combined all  
1205 fragments for each cell type from left ventricular datasets. The 'coverage' option of  
1206 BEDtools<sup>80</sup> was applied with default settings to count the total number of chromatin  
1207 fragments from each ventricular cell type overlapping the candidate enhancer  
1208 annotations. This yielded a raw count matrix in the format of snATAC-seq cell types  
1209 (columns) by candidate enhancers (rows). The raw count matrix was normalized to RPKM



1210 (reads per kilobase per million mapped reads) for each candidate enhancer. We next  
1211 used Cluster3.0<sup>104</sup> to k-means cluster the 31,033 healthy heart candidate enhancers into  
1212 K groups between 2 and 12 with the following settings (Method = *k-Means*, Similarity  
1213 Metric = *Euclidian distance*, number of runs = 100). We calculated the Davies-Bouldin  
1214 (DB) index<sup>81</sup> as described above for each clustering using the *index.DB* function of the R  
1215 package clusterSim (<http://keii.ue.wroc.pl/clusterSim/>). We selected a k-means of 8,  
1216 which yielded the lowest DB index, indicating the best partitioning.  
1217 We repeated the above analysis for 4,406 candidate enhancers reported have increased  
1218 bulk H3K27ac ChIP signal and 3,101 candidate enhancers reported to have decreased  
1219 signal in 18 late stage idiopathic dilated cardiomyopathy (heart failure) left ventricles  
1220 versus 18 healthy control left ventricles reported in the same study. We again clustered  
1221 the candidate enhancers for both groups into k groups between 2 and 12 as above and  
1222 selected the clustering that yielded the lowest DB index<sup>81</sup>.

1223

#### 1224 **Genome-wide association study (GWAS) variant enrichment analysis**

1225 We used LD (linkage disequilibrium) score regression<sup>41,105</sup> to estimate genome-wide  
1226 enrichment for variants associated with GWAS traits within cell type-resolved open  
1227 chromatin sites. We compiled published GWAS summary statistics for cardiovascular  
1228 diseases<sup>42-46</sup>, other diseases<sup>106-117</sup>, and non-disease traits<sup>118-127</sup> using the European  
1229 subset from transethnic studies where applicable. We created custom LD score files by  
1230 using peaks from each cluster as a binary annotation. In addition to the baseline  
1231 annotations included in the baseline-LD model v2.2, we also included LD scores created  
1232 from the merged peaks across all clusters as the background. For each trait, we used LD  
1233 score regression to estimate enrichment z-scores for each annotation relative to the  
1234 background. Using these z-scores, we computed one-sided p-values for enrichment and  
1235 used the Benjamini Hochberg procedure to correct for multiple tests.

1236

#### 1237 **Fine mapping for atrial fibrillation**

1238 We obtained published atrial fibrillation GWAS summary statistics and index variants for  
1239 111 disease-associated loci<sup>43</sup>. To construct credible sets of variants for each locus, we  
1240 first extracted all variants in linkage disequilibrium ( $r^2 > 0.1$  using the EUR subset of 1000

1241 Genomes Phase 3)<sup>128</sup> in a large window ( $\pm 2.5$  Mb) around each index variant. We next  
1242 calculated approximate Bayes factors<sup>47</sup> (ABF) for each variant using effect size and  
1243 standard error estimates. We then calculated posterior probabilities of association (PPA)  
1244 for each variant by dividing its ABF by the sum of ABF for all variants within the locus. For  
1245 each locus, we then defined 99% credible sets by sorting variants by descending PPA  
1246 and retaining variants that added up to a cumulative PPA of  $> 0.99$ . This resulted in an  
1247 output of 6,014 candidate causal variants.

1248

### 1249 **Variant prioritization for functional validation**

1250 To prioritize variants for functional validation, we refined our list of candidate causal  
1251 variants from fine mapping analysis to only those with a posterior probability of  
1252 association (PPA)  $> 0.1$  (216 remaining out of 6,014). We used BEDtools<sup>80</sup> to intersect  
1253 these variants with ATAC-seq peaks called on an aggregate .bed file for atrial and  
1254 ventricular cardiomyocyte snATAC-seq clusters (cardiomyocyte cCREs). This resulted in  
1255 40 fine-mapped variants that resided within 38 candidate cardiomyocyte cCREs (38  
1256 cCRE-variant pairs).

1257 We assessed each remaining cCRE-variant pair via the following criteria:

- 1258 • cCREs primarily accessible in cardiomyocytes
- 1259 • presence of a corresponding ATAC-seq peak at a testable time point in the *in vitro*  
1260 hPSC-cardiomyocyte differentiation model system
- 1261 • sequence conservation in 100 vertebrates (genome browser track generated using  
1262 phyloP of the PHAST5 package downloaded from UCSC genome browser<sup>129</sup>,  
1263 <http://hgdownload.soe.ucsc.edu/goldenPath/hg38/phyloP100way/>)
- 1264 • predicted co-accessibility of candidate enhancer with a gene promoter
- 1265 • expression of putative target gene associated with cCRE appearance (chromatin  
1266 accessibility and H3K27ac) during hPSC-cardiomyocyte differentiation<sup>49</sup>

1267 A candidate cCRE-variant pair at the *KCNH2* locus was prioritized for functional  
1268 experimentation.

1269

### 1270 **ChIP-seq data processing**

1271 Reads were mapped to the human genome reference GRCh38 using Bowtie2 (version  
1272 2.2.6)<sup>130</sup> and reads with MAPQ > 30 selected using SAMtools (version 1.3.1)<sup>131</sup>. PCR  
1273 duplicates were removed using MarkDuplicates function of Picard tools (version 1.119)<sup>132</sup>.  
1274 RPKM normalized signal tracks were generated using BamCoverage function in  
1275 deepTools (version 2.4.1)<sup>133</sup>.

1276

### 1277 **RNA-seq data processing**

1278 Reads were mapped to the human genome reference GRCh38 using STAR (version  
1279 020201)<sup>134</sup> and reads with MAPQ > 30 selected using SAMtools (version 1.3.1)<sup>131</sup>. PCR  
1280 duplicates were removed using MarkDuplicates function of Picard tools (version  
1281 1.1.19)<sup>132</sup>. RPKM normalized signal tracks were generated using BamCoverage function  
1282 in deepTools (version 2.4.1)<sup>133</sup>.

1283

### 1284 **ATAC-seq data processing**

1285 Reads were mapped to the human genome reference GRCh38 using Bowtie2 (version  
1286 2.2.6)<sup>130</sup> and reads with MAPQ > 30 selected using SAMtools (version 1.3.1)<sup>131</sup>. PCR  
1287 duplicates were removed using SAMtools (version 1.3.1)<sup>131</sup>. RPKM normalized signal  
1288 tracks were generated using BamCoverage function in deepTools (version 2.4.1)<sup>133</sup>.

1289

### 1290 **Statistics**

1291 No statistical methods were used to predetermine sample sizes. There was no  
1292 randomization of the samples, and investigators were not blinded to the specimens being  
1293 investigated. However, clustering of single nuclei based on chromatin accessibility was  
1294 performed in an unbiased manner, and cell types were assigned after clustering. Low-  
1295 quality nuclei and potential barcode collisions were excluded from downstream analysis  
1296 as outlined above. Cluster-specificity at each cCRE was tested using edgeR<sup>102</sup> as  
1297 described above, with p-values corrected via the Benjamini Hochberg method. To identify  
1298 differentially accessible sites between heart chambers and for each cell type, a likelihood  
1299 ratio test was used, and the resulting p-value was corrected using the Benjamini  
1300 Hochberg method. For significance of ontology enrichments using GREAT, Bonferroni-  
1301 corrected binomial p values were used<sup>28</sup>. For significance testing of enrichment of *de*

1302 *novo* and known motifs, a hypergeometric test was used without correction for multiple  
1303 testing<sup>30</sup>. For luciferase and qPCR data, we performed one-way ANOVA (ANalysis Of  
1304 VAriance) analysis with post-hoc Tukey HSD (Honestly Significant Difference) using  
1305 GraphPad Prism version 8.0.0 for Windows, GraphPad Software, San Diego, California  
1306 USA, [www.graphpad.com](http://www.graphpad.com).

1307

### 1308 **External datasets**

1309 Cardiomyocyte differentiation: RNA-Seq, H3K27ac day 0 (hPSC); day 5 (cardiac  
1310 mesoderm); and day 15 (primitive cardiomyocytes) were downloaded from GSE116862<sup>49</sup>.  
1311 Signal tracks for heart H3K27ac CHIP-seq data were downloaded from  
1312 <https://portal.nersc.gov/dna/RD/heart/>. List of candidate enhancers was downloaded from  
1313 Supplemental tables<sup>14</sup>. H3K27ac CHIP-seq data for cardiomyocyte nuclei from non-failing  
1314 donors (NF1) were downloaded from NCBI SRA BioProject ID PRJNA353755<sup>135</sup>.

1315

### 1316 **Code availability**

1317 The pipeline for processing snATAC-seq data is available as a part of the Taiji software:  
1318 <https://taiji-pipeline.github.io/>

1319 Custom code used for demultiplexing and downstream analysis for snATAC data is  
1320 available here:

1321 <https://gitlab.com/Groumf/ATACdemultiplex/-/tree/master/ATACdemultiplex>

1322 <https://gitlab.com/Groumf/ATACdemultiplex/-/blob/master/scripts/>

1323 The protocol for the custom set of motifs used with chromVAR<sup>29</sup> can be found here:

1324 <https://github.com/GreenleafLab/chromVARmotifs>

1325

### 1326 **Data availability**

1327 Data will be deposited to dbGAP. Processed data can be explored using our publicly-  
1328 available web portal including a UCSC cell browser  
1329 (<https://github.com/maximilianh/cellBrowser>) and genome browser track viewer (IGV.js:  
1330 <https://github.com/igvteam/igv.js#igvjs>): <http://catlas.org/humanheart>.

1331 **REFERENCES**

1332

- 1333 1. WHO. Cardiovascular Diseases (CVDs). (2017).  
1334 2. Roadmap Epigenomics, C., *et al.* Integrative analysis of 111 reference human  
1335 epigenomes. *Nature* **518**, 317-330 (2015).  
1336 3. Consortium, E.P. An integrated encyclopedia of DNA elements in the human  
1337 genome. *Nature* **489**, 57-74 (2012).  
1338 4. Thurman, R.E., *et al.* The accessible chromatin landscape of the human genome.  
1339 *Nature* **489**, 75-82 (2012).  
1340 5. Smemo, S., *et al.* Regulatory variation in a TBX5 enhancer leads to isolated  
1341 congenital heart disease. *Hum Mol Genet* **21**, 3255-3263 (2012).  
1342 6. Zaidi, S. & Brueckner, M. Genetics and Genomics of Congenital Heart Disease.  
1343 *Circ Res* **120**, 923-940 (2017).  
1344 7. Maurano, M.T., *et al.* Systematic localization of common disease-associated  
1345 variation in regulatory DNA. *Science (New York, N.Y.)* **337**, 1190-1195 (2012).  
1346 8. Cui, Y., *et al.* Single-Cell Transcriptome Analysis Maps the Developmental Track  
1347 of the Human Heart. *Cell Rep* **26**, 1934-1950 e1935 (2019).  
1348 9. Litvinukova, M., *et al.* Cells and gene expression programs in the adult human  
1349 heart. *bioRxiv*, 2020.2004.2003.024075 (2020).  
1350 10. Tucker, N.R., *et al.* Transcriptional and Cellular Diversity of the Human Heart.  
1351 *Circulation* (2020).  
1352 11. Asp, M., *et al.* A Spatiotemporal Organ-Wide Gene Expression and Cell Atlas of  
1353 the Developing Human Heart. *Cell* **179**, 1647-1660.e1619 (2019).  
1354 12. Dickel, D.E., *et al.* Genome-wide compendium and functional assessment of in  
1355 vivo heart enhancers. *Nature communications* **7**, 12923-12923 (2016).  
1356 13. May, D., *et al.* Large-scale discovery of enhancers from human heart tissue.  
1357 *Nature genetics* **44**, 89-93 (2011).  
1358 14. Spurrell, C.H., *et al.* Genome-Wide Fetalization of Enhancer Architecture in Heart  
1359 Disease. *bioRxiv*, 591362 (2019).  
1360 15. Gilsbach, R., *et al.* Distinct epigenetic programs regulate cardiac myocyte  
1361 development and disease in the human heart in vivo. *Nat Commun* **9**, 391 (2018).  
1362 16. Tan, W.L.W., *et al.* Epigenomes of Human Hearts Reveal New Genetic Variants  
1363 Relevant for Cardiac Disease and Phenotype. *Circ Res* (2020).  
1364 17. Preissl, S., *et al.* Single-nucleus analysis of accessible chromatin in developing  
1365 mouse forebrain reveals cell-type-specific transcriptional regulation. *Nat Neurosci*  
1366 **21**, 432-439 (2018).  
1367 18. Cusanovich, D.A., *et al.* Multiplex single cell profiling of chromatin accessibility by  
1368 combinatorial cellular indexing. *Science* **348**, 910-914 (2015).  
1369 19. Buenrostro, J.D., *et al.* Single-cell chromatin accessibility reveals principles of  
1370 regulatory variation. *Nature* **523**, 486-490 (2015).  
1371 20. Cusanovich, D.A., *et al.* A Single-Cell Atlas of In Vivo Mammalian Chromatin  
1372 Accessibility. *Cell* **174**, 1309-1324.e1318 (2018).  
1373 21. Jia, G., *et al.* Single cell RNA-seq and ATAC-seq analysis of cardiac progenitor  
1374 cell transition states and lineage settlement. *Nat Commun* **9**, 4877 (2018).

- 1375 22. Fang, R., *et al.* Fast and Accurate Clustering of Single Cell Epigenomes Reveals  
1376 <em>Cis</em>-Regulatory Elements in Rare Cell Types. *bioRxiv*, 615179 (2019).
- 1377 23. Stuart, T., *et al.* Comprehensive Integration of Single-Cell Data. *Cell* **177**, 1888-  
1378 1902 e1821 (2019).
- 1379 24. Ng, S.Y., Wong, C.K. & Tsang, S.Y. Differential gene expressions in atrial and  
1380 ventricular myocytes: insights into the road of applying embryonic stem cell-  
1381 derived cardiomyocytes for future therapies. *Am J Physiol Cell Physiol* **299**,  
1382 C1234-1249 (2010).
- 1383 25. Zhang, Y., *et al.* Model-based Analysis of ChIP-Seq (MACS). *Genome Biology* **9**,  
1384 R137 (2008).
- 1385 26. An integrated encyclopedia of DNA elements in the human genome. *Nature* **489**,  
1386 57-74 (2012).
- 1387 27. A user's guide to the encyclopedia of DNA elements (ENCODE). *PLoS Biol* **9**,  
1388 e1001046 (2011).
- 1389 28. McLean, C.Y., *et al.* GREAT improves functional interpretation of cis-regulatory  
1390 regions. *Nature Biotechnology* **28**, 495-501 (2010).
- 1391 29. Schep, A.N., Wu, B., Buenrostro, J.D. & Greenleaf, W.J. chromVAR: inferring  
1392 transcription-factor-associated accessibility from single-cell epigenomic data.  
1393 *Nature Methods* **14**, 975-978 (2017).
- 1394 30. Heinz, S., *et al.* Simple combinations of lineage-determining transcription factors  
1395 prime cis-regulatory elements required for macrophage and B cell identities. *Mol*  
1396 *Cell* **38**, 576-589 (2010).
- 1397 31. Zhang, D.E., Hetherington, C.J., Chen, H.M. & Tenen, D.G. The macrophage  
1398 transcription factor PU.1 directs tissue-specific expression of the macrophage  
1399 colony-stimulating factor receptor. *Molecular and cellular biology* **14**, 373-381  
1400 (1994).
- 1401 32. Moorman, A.F.M. & Christoffels, V.M. Cardiac Chamber Formation: Development,  
1402 Genes, and Evolution. *Physiological Reviews* **83**, 1223-1267 (2003).
- 1403 33. Pliner, H.A., *et al.* Cicero Predicts cis-Regulatory DNA Interactions from Single-  
1404 Cell Chromatin Accessibility Data. *Molecular cell* **71**, 858-871.e858 (2018).
- 1405 34. Veevers, J., *et al.* Cell-Surface Marker Signature for Enrichment of Ventricular  
1406 Cardiomyocytes Derived from Human Embryonic Stem Cells. *Stem Cell Reports*  
1407 **11**, 828-841 (2018).
- 1408 35. Hortells, L., Johansen, A.K.Z. & Yutzey, K.E. Cardiac Fibroblasts and the  
1409 Extracellular Matrix in Regenerative and Nonregenerative Hearts. *J Cardiovasc*  
1410 *Dev Dis* **6**(2019).
- 1411 36. Bruneau, B.G., *et al.* Cardiac expression of the ventricle-specific homeobox gene  
1412 *Irx4* is modulated by *Nkx2-5* and *dHand*. *Developmental biology* **217**, 266-277  
1413 (2000).
- 1414 37. Hook, P.W. & McCallion, A.S. Leveraging mouse chromatin data for heritability  
1415 enrichment informs common disease architecture and reveals cortical layer  
1416 contributions to schizophrenia. *bioRxiv*, 427484 (2019).
- 1417 38. Nott, A., *et al.* Brain cell type-specific enhancer-promoter interactome maps and  
1418 disease<strong>-</strong>risk association. *Science* **366**, 1134-1139 (2019).
- 1419 39. Chiou, J., *et al.* Single cell chromatin accessibility reveals pancreatic islet cell type-  
1420 and state-specific regulatory programs of diabetes risk. *bioRxiv*, 693671 (2019).



- 1421 40. Corces, M.R., *et al.* Single-cell epigenomic identification of inherited risk loci in  
1422 Alzheimer's and Parkinson's disease. *bioRxiv* (2020).
- 1423 41. Bulik-Sullivan, B.K., *et al.* LD Score regression distinguishes confounding from  
1424 polygenicity in genome-wide association studies. *Nature Genetics* **47**, 291-295  
1425 (2015).
- 1426 42. Arvanitis, M., *et al.* Genome-wide association and multi-omic analyses reveal  
1427 ACTN2 as a gene linked to heart failure. *Nature Communications* **11**, 1122 (2020).
- 1428 43. Nielsen, J.B., *et al.* Biobank-driven genomic discovery yields new insight into atrial  
1429 fibrillation biology. *Nat Genet* **50**, 1234-1239 (2018).
- 1430 44. Nelson, C.P., *et al.* Association analyses based on false discovery rate implicate  
1431 new loci for coronary artery disease. *Nature Genetics* **49**, 1385-1391 (2017).
- 1432 45. Shadrina, A.S., Sharapov, S.Z., Shashkova, T.I. & Tsepilov, Y.A. Varicose veins  
1433 of lower extremities: Insights from the first large-scale genetic study. *PLoS Genet*  
1434 **15**, e1008110-e1008110 (2019).
- 1435 46. Malik, R., *et al.* Multiancestry genome-wide association study of 520,000 subjects  
1436 identifies 32 loci associated with stroke and stroke subtypes. *Nature Genetics* **50**,  
1437 524-537 (2018).
- 1438 47. Wakefield, J. Bayes factors for genome-wide association studies: comparison with  
1439 P-values. *Genetic epidemiology* **33**, 79-86 (2009).
- 1440 48. van den Boogaard, M., *et al.* A common genetic variant within SCN10A modulates  
1441 cardiac SCN5A expression. *J Clin Invest* **124**, 1844-1852 (2014).
- 1442 49. Zhang, Y., *et al.* 3D Chromatin Architecture Remodeling during Human  
1443 Cardiomyocyte Differentiation Reveals A Role Of HERV-H In Demarcating  
1444 Chromatin Domains. *bioRxiv* (2019).
- 1445 50. Visel, A., Minovitsky, S., Dubchak, I. & Pennacchio, L.A. VISTA Enhancer  
1446 Browser--a database of tissue-specific human enhancers. *Nucleic acids research*  
1447 **35**, D88-92 (2007).
- 1448 51. Curran, M.E., *et al.* A molecular basis for cardiac arrhythmia: HERG mutations  
1449 cause long QT syndrome. *Cell* **80**, 795-803 (1995).
- 1450 52. Jones, D.K., *et al.* hERG 1b is critical for human cardiac repolarization. *Proc Natl*  
1451 *Acad Sci U S A* **111**, 18073-18077 (2014).
- 1452 53. Gilsbach, R., *et al.* Dynamic DNA methylation orchestrates cardiomyocyte  
1453 development, maturation and disease. *Nat Commun* **5**, 5288 (2014).
- 1454 54. Wang, Q., *et al.* CoBATCH for High-Throughput Single-Cell Epigenomic Profiling.  
1455 *Mol Cell* **76**, 206-216 e207 (2019).
- 1456 55. Kaya-Okur, H.S., *et al.* CUT&Tag for efficient epigenomic profiling of small  
1457 samples and single cells. *Nat Commun* **10**, 1930 (2019).
- 1458 56. Sudlow, C., *et al.* UK biobank: an open access resource for identifying the causes  
1459 of a wide range of complex diseases of middle and old age. *PLoS Med* **12**,  
1460 e1001779 (2015).
- 1461 57. Ishigaki, K., *et al.* Large-scale genome-wide association study in a Japanese  
1462 population identifies novel susceptibility loci across different diseases. *Nat Genet*  
1463 (2020).
- 1464 58. NHLBI. Trans-Omics for Precision Medicine (TOPMed) Program. (2014).

- 1465 59. Leland McInnes, J.H., Nathaniel Saul, Lukas Großberger. UMAP: Uniform  
1466 Manifold Approximation and Projection. *Journal of Open Source Software* **3(29)**,  
1467 861 (2018).
- 1468 60. Robinson, J.T., *et al.* Integrative genomics viewer. *Nat Biotechnol* **29**, 24-26  
1469 (2011).
- 1470 61. Harrow, J., *et al.* GENCODE: producing a reference annotation for ENCODE.  
1471 *Genome Biol* **7 Suppl 1**, S4 1-9 (2006).
- 1472 62. Wolock, S.L., Lopez, R. & Klein, A.M. Scrublet: Computational Identification of Cell  
1473 Doublets in Single-Cell Transcriptomic Data. *Cell Systems* **8**, 281-291.e289  
1474 (2019).
- 1475 63. Smyth, J.W., *et al.* Limited forward trafficking of connexin 43 reduces cell-cell  
1476 coupling in stressed human and mouse myocardium. *J Clin Invest* **120**, 266-279  
1477 (2010).
- 1478 64. Chen, G., *et al.* Chemically defined conditions for human iPSC derivation and  
1479 culture. *Nat Methods* **8**, 424-429 (2011).
- 1480 65. Watanabe, K., *et al.* A ROCK inhibitor permits survival of dissociated human  
1481 embryonic stem cells. *Nat Biotechnol* **25**, 681-686 (2007).
- 1482 66. Lian, X., *et al.* Directed cardiomyocyte differentiation from human pluripotent stem  
1483 cells by modulating Wnt/ $\beta$ -catenin signaling under fully defined conditions. *Nature*  
1484 *protocols* **8**, 162-175 (2013).
- 1485 67. Teumer, A., *et al.* Genome-wide Association Studies Identify Genetic Loci  
1486 Associated With Albuminuria in Diabetes. *Diabetes* **65**, 803-817 (2016).
- 1487 68. Haeussler, M., *et al.* Evaluation of off-target and on-target scoring algorithms and  
1488 integration into the guide RNA selection tool CRISPOR. *Genome Biology* **17**, 148  
1489 (2016).
- 1490 69. Kim, S., Kim, D., Cho, S.W., Kim, J. & Kim, J.S. Highly efficient RNA-guided  
1491 genome editing in human cells via delivery of purified Cas9 ribonucleoproteins.  
1492 *Genome research* **24**, 1012-1019 (2014).
- 1493 70. Zuris, J.A., *et al.* Cationic lipid-mediated delivery of proteins enables efficient  
1494 protein-based genome editing in vitro and in vivo. *Nat Biotechnol* **33**, 73-80 (2015).
- 1495 71. Santos, D.P., Kiskinis, E., Eggan, K. & Merkle, F.T. Comprehensive Protocols for  
1496 CRISPR/Cas9-based Gene Editing in Human Pluripotent Stem Cells. *Curr Protoc*  
1497 *Stem Cell Biol* **38**, 5b.6.1-5b.6.60 (2016).
- 1498 72. Fabian Pedregosa, G.V., Alexandre Gramfort, Vincent Michel, Bertrand Thirion,  
1499 Olivier Grisel, Mathieu Blondel, Peter Prettenhofer, Ron Weiss, Vincent Dubourg,  
1500 Jake Vanderplas, Alexandre Passos, David Cournapeau, Matthieu Brucher,  
1501 Matthieu Perrot, Édouard Duchesnay. Scikit-learn: Machine Learning in Python.  
1502 *Journal of Machine Learning Research* **12(85)**, 2825–2830 (2011).
- 1503 73. Bouneffouf, D.B., I. Theoretical analysis of the Minimum Sum of Squared  
1504 Similarities sampling for Nyström-based spectral clustering. . *2016 International*  
1505 *Joint Conference on Neural Networks (IJCNN)*, 3856–3862 (2016).
- 1506 74. Haghverdi, L., Lun, A.T.L., Morgan, M.D. & Marioni, J.C. Batch effects in single-  
1507 cell RNA-sequencing data are corrected by matching mutual nearest neighbors.  
1508 *Nat Biotechnol* **36**, 421-427 (2018).
- 1509 75. Traag, V.A., Waltman, L. & van Eck, N.J. From Louvain to Leiden: guaranteeing  
1510 well-connected communities. *Sci Rep* **9**, 5233 (2019).



- 1511 76. Traag, V.A., Van Dooren, P. & Nesterov, Y. Narrow scope for resolution-limit-free  
1512 community detection. *Phys Rev E Stat Nonlin Soft Matter Phys* **84**, 016114 (2011).
- 1513 77. McGinnis, C.S., Murrow, L.M. & Gartner, Z.J. DoubletFinder: Doublet Detection in  
1514 Single-Cell RNA Sequencing Data Using Artificial Nearest Neighbors. *Cell*  
1515 *Systems* **8**, 329-337.e324 (2019).
- 1516 78. Korsunsky, I., *et al.* Fast, sensitive and accurate integration of single-cell data with  
1517 Harmony. *Nat Methods* **16**, 1289-1296 (2019).
- 1518 79. Amemiya, H.M., Kundaje, A. & Boyle, A.P. The ENCODE Blacklist: Identification  
1519 of Problematic Regions of the Genome. *Scientific Reports* **9**, 9354 (2019).
- 1520 80. Quinlan, A.R. & Hall, I.M. BEDTools: a flexible suite of utilities for comparing  
1521 genomic features. *Bioinformatics* **26**, 841-842 (2010).
- 1522 81. Davies, D.L. & Bouldin, D.W. A Cluster Separation Measure. *IEEE Transactions*  
1523 *on Pattern Analysis and Machine Intelligence* **PAMI-1**, 224-227 (1979).
- 1524 82. Ng, S.Y., Wong, C.K. & Tsang, S.Y. Differential gene expressions in atrial and  
1525 ventricular myocytes: insights into the road of applying embryonic stem cell-  
1526 derived cardiomyocytes for future therapies. *American Journal of Physiology-Cell*  
1527 *Physiology* **299**, C1234-C1249 (2010).
- 1528 83. Sheikh, F., Lyon, R.C. & Chen, J. Functions of myosin light chain-2 (MYL2) in  
1529 cardiac muscle and disease. *Gene* **569**, 14-20 (2015).
- 1530 84. Kubalak, S.W., Miller-Hance, W.C., O'Brien, T.X., Dyson, E. & Chien, K.R.  
1531 Chamber specification of atrial myosin light chain-2 expression precedes septation  
1532 during murine cardiogenesis. *Journal of Biological Chemistry* **269**, 16961-16970  
1533 (1994).
- 1534 85. Furtado, M.B., *et al.* Cardiogenic genes expressed in cardiac fibroblasts contribute  
1535 to heart development and repair. *Circulation research* **114**, 1422-1434 (2014).
- 1536 86. Nichol, D. & Stuhlmann, H. EGFL7: a unique angiogenic signaling factor in  
1537 vascular development and disease. *Blood* **119**, 1345-1352 (2012).
- 1538 87. Kalucka, J., *et al.* Single-Cell Transcriptome Atlas of Murine Endothelial Cells. *Cell*  
1539 **180**, 764-779.e720 (2020).
- 1540 88. Shanahan, C.M., Weissberg, P.L. & Metcalfe, J.C. Isolation of gene markers of  
1541 differentiated and proliferating vascular smooth muscle cells. *Circulation Research*  
1542 **73**, 193-204 (1993).
- 1543 89. Schaum, N., *et al.* Single-cell transcriptomics of 20 mouse organs creates a Tabula  
1544 Muris. *Nature* **562**, 367-372 (2018).
- 1545 90. Fabrick, B.O., Dijkstra, C.D. & van den Berg, T.K. The macrophage scavenger  
1546 receptor CD163. *Immunobiology* **210**, 153-160 (2005).
- 1547 91. Martinez, F.O., Gordon, S., Locati, M. & Mantovani, A. Transcriptional Profiling of  
1548 the Human Monocyte-to-Macrophage Differentiation and Polarization: New  
1549 Molecules and Patterns of Gene Expression. *The Journal of Immunology* **177**,  
1550 7303-7311 (2006).
- 1551 92. Peschon, J.J., *et al.* Early lymphocyte expansion is severely impaired in interleukin  
1552 7 receptor-deficient mice. *J Exp Med* **180**, 1955-1960 (1994).
- 1553 93. Lesourne, R., *et al.* Themis, a T cell-specific protein important for late thymocyte  
1554 development. *Nat Immunol* **10**, 840-847 (2009).

- 1555 94. Puri, V., *et al.* Cidea is associated with lipid droplets and insulin sensitivity in  
1556 humans. *Proceedings of the National Academy of Sciences* **105**, 7833-7838  
1557 (2008).
- 1558 95. Hu, E., Liang, P. & Spiegelman, B.M. AdipoQ Is a Novel Adipose-specific Gene  
1559 Dysregulated in Obesity. *Journal of Biological Chemistry* **271**, 10697-10703  
1560 (1996).
- 1561 96. Skelly, D.A., *et al.* Single-Cell Transcriptional Profiling Reveals Cellular Diversity  
1562 and Intercommunication in the Mouse Heart. *Cell Rep* **22**, 600-610 (2018).
- 1563 97. Zhao, Y.-y., *et al.* Neuregulins Promote Survival and Growth of Cardiac Myocytes:  
1564 PERSISTENCE OF ErbB2 AND ErbB4 EXPRESSION IN NEONATAL AND  
1565 ADULT VENTRICULAR MYOCYTES. *Journal of Biological Chemistry* **273**, 10261-  
1566 10269 (1998).
- 1567 98. Tang, J., *et al.* Genetic Fate Mapping Defines the Vascular Potential of Endocardial  
1568 Cells in the Adult Heart. *Circ Res* **122**, 984-993 (2018).
- 1569 99. Southern, B.D., *et al.* Matrix-driven Myosin II Mediates the Pro-fibrotic Fibroblast  
1570 Phenotype. *The Journal of biological chemistry* **291**, 6083-6095 (2016).
- 1571 100. Baum, J. & Duffy, H.S. Fibroblasts and myofibroblasts: what are we talking about?  
1572 *J Cardiovasc Pharmacol* **57**, 376-379 (2011).
- 1573 101. Vanlandewijck, M., *et al.* A molecular atlas of cell types and zonation in the brain  
1574 vasculature. *Nature* **554**, 475-480 (2018).
- 1575 102. Robinson, M.D., McCarthy, D.J. & Smyth, G.K. edgeR: a Bioconductor package  
1576 for differential expression analysis of digital gene expression data. *Bioinformatics*  
1577 **26**, 139-140 (2010).
- 1578 103. Mathelier, A., *et al.* JASPAR 2016: a major expansion and update of the open-  
1579 access database of transcription factor binding profiles. *Nucleic acids research* **44**,  
1580 D110-115 (2016).
- 1581 104. de Hoon, M.J.L., Imoto, S., Nolan, J. & Miyano, S. Open source clustering  
1582 software. *Bioinformatics* **20**, 1453-1454 (2004).
- 1583 105. Finucane, H.K., *et al.* Partitioning heritability by functional annotation using  
1584 genome-wide association summary statistics. *Nature Genetics* **47**, 1228-1235  
1585 (2015).
- 1586 106. Ripke, S., *et al.* Biological insights from 108 schizophrenia-associated genetic loci.  
1587 *Nature* **511**, 421-427 (2014).
- 1588 107. Wiberg, A., *et al.* A genome-wide association analysis identifies 16 novel  
1589 susceptibility loci for carpal tunnel syndrome. *Nature Communications* **10**, 1030  
1590 (2019).
- 1591 108. Grove, J., *et al.* Identification of common genetic risk variants for autism spectrum  
1592 disorder. *Nature Genetics* **51**, 431-444 (2019).
- 1593 109. Tachmazidou, I., *et al.* Identification of new therapeutic targets for osteoarthritis  
1594 through genome-wide analyses of UK Biobank data. *Nature Genetics* **51**, 230-236  
1595 (2019).
- 1596 110. de Lange, K.M., *et al.* Genome-wide association study implicates immune  
1597 activation of multiple integrin genes in inflammatory bowel disease. *Nature*  
1598 *Genetics* **49**, 256-261 (2017).

- 1599 111. Wray, N.R., *et al.* Genome-wide association analyses identify 44 risk variants and  
1600 refine the genetic architecture of major depression. *Nature Genetics* **50**, 668-681  
1601 (2018).
- 1602 112. Mahajan, A., *et al.* Fine-mapping type 2 diabetes loci to single-variant resolution  
1603 using high-density imputation and islet-specific epigenome maps. *Nature Genetics*  
1604 **50**, 1505-1513 (2018).
- 1605 113. Lambert, J.-C., *et al.* Meta-analysis of 74,046 individuals identifies 11 new  
1606 susceptibility loci for Alzheimer's disease. *Nature Genetics* **45**, 1452-1458 (2013).
- 1607 114. Okada, Y., *et al.* Genetics of rheumatoid arthritis contributes to biology and drug  
1608 discovery. *Nature* **506**, 376-381 (2014).
- 1609 115. Bentham, J., *et al.* Genetic association analyses implicate aberrant regulation of  
1610 innate and adaptive immunity genes in the pathogenesis of systemic lupus  
1611 erythematosus. *Nature Genetics* **47**, 1457-1464 (2015).
- 1612 116. Aylward, A., Chiou, J., Okino, M.L., Kadakia, N. & Gaulton, K.J. Shared genetic  
1613 risk contributes to type 1 and type 2 diabetes etiology. *Hum Mol Genet* (2018).
- 1614 117. Sakornsakolpat, P., *et al.* Genetic landscape of chronic obstructive pulmonary  
1615 disease identifies heterogeneous cell-type and phenotype associations. *Nat Genet*  
1616 **51**, 494-505 (2019).
- 1617 118. den Hoed, M., *et al.* Identification of heart rate-associated loci and their effects on  
1618 cardiac conduction and rhythm disorders. *Nature Genetics* **45**, 621-631 (2013).
- 1619 119. Okbay, A., *et al.* Genome-wide association study identifies 74 loci associated with  
1620 educational attainment. *Nature* **533**, 539-542 (2016).
- 1621 120. Locke, A.E., *et al.* Genetic studies of body mass index yield new insights for obesity  
1622 biology. *Nature* **518**, 197-206 (2015).
- 1623 121. Day, F.R., *et al.* Genomic analyses identify hundreds of variants associated with  
1624 age at menarche and support a role for puberty timing in cancer risk. *Nature*  
1625 *Genetics* **49**, 834-841 (2017).
- 1626 122. Day, F.R., *et al.* Large-scale genomic analyses link reproductive aging to  
1627 hypothalamic signaling, breast cancer susceptibility and BRCA1-mediated DNA  
1628 repair. *Nat Genet* **47**, 1294-1303 (2015).
- 1629 123. Wood, A.R., *et al.* Defining the role of common variation in the genomic and  
1630 biological architecture of adult human height. *Nature Genetics* **46**, 1173-1186  
1631 (2014).
- 1632 124. Horikoshi, M., *et al.* Genome-wide associations for birth weight and correlations  
1633 with adult disease. *Nature* **538**, 248-252 (2016).
- 1634 125. Jiang, X., *et al.* Genome-wide association study in 79,366 European-ancestry  
1635 individuals informs the genetic architecture of 25-hydroxyvitamin D levels. *Nat*  
1636 *Commun* **9**, 260 (2018).
- 1637 126. Wittemans, L.B.L., *et al.* Assessing the causal association of glycine with risk of  
1638 cardio-metabolic diseases. *Nature Communications* **10**, 1060 (2019).
- 1639 127. Jansen, P.R., *et al.* Genome-wide analysis of insomnia in 1,331,010 individuals  
1640 identifies new risk loci and functional pathways. *Nature Genetics* **51**, 394-403  
1641 (2019).
- 1642 128. Auton, A., *et al.* A global reference for human genetic variation. *Nature* **526**, 68-74  
1643 (2015).

- 1644 129. Siepel, A., *et al.* Evolutionarily conserved elements in vertebrate, insect, worm, and  
1645 yeast genomes. *Genome research* **15**, 1034-1050 (2005).
- 1646 130. Langmead, B. & Salzberg, S.L. Fast gapped-read alignment with Bowtie 2. *Nat*  
1647 *Methods* **9**, 357-359 (2012).
- 1648 131. Li, H., *et al.* The Sequence Alignment/Map format and SAMtools. *Bioinformatics*  
1649 **25**, 2078-2079 (2009).
- 1650 132. Institute, B. Picard Toolkit. *Broad Institute, GitHub Repository* (2019).
- 1651 133. Ramirez, F., Dundar, F., Diehl, S., Gruning, B.A. & Manke, T. deepTools: a flexible  
1652 platform for exploring deep-sequencing data. *Nucleic acids research* **42**, W187-  
1653 191 (2014).
- 1654 134. Dobin, A., *et al.* STAR: ultrafast universal RNA-seq aligner. *Bioinformatics* **29**, 15-  
1655 21 (2013).
- 1656 135. Deutsch, M.A., *et al.* Reactivation of the Nkx2.5 cardiac enhancer after myocardial  
1657 infarction does not presage myogenesis. *Cardiovasc Res* **114**, 1098-1114 (2018).

1658
